# Supplementary material for: Regulation of gene expression dynamics during developmental transitions by the Ikaros transcription factor
Source: PubMed Central journal article supplement — Genes Dev. 2015 Sep 1;29(17):1801–16. doi: 10.1101/gad.266999.115 (PMC4573854; doi:10.1101/gad.266999.115), 2015-09-01

## Supplementary Figure Legends

**Supplementary Figure S1.** Decline of DN2, DN3, and DP populations in *Ikzf1*<sup>ΔF4/ΔF4</sup> mice worsens with age. (A) Shown are the averages of the absolute cell numbers of each thymocyte subset in WT and *Ikzf1*<sup>ΔF4/ΔF4</sup> mice at 4-, 5-, and 6-weeks (wk) and the ratios of WT over *Ikzf1*<sup>ΔF4/ΔF4</sup> absolute cell numbers. (B) Shown are staining profiles of lin<sup>-</sup>CD44<sup>+</sup>c-Kit<sup>+</sup> gated thymocytes in WT and *Ikzf1*<sup>ΔF4/ΔF4</sup> mice at 4, 5, and 6 wk. The absolute mean percentages are indicated (n=4-6). (C) Shown are absolute numbers of ETP cells in WT and *Ikzf1*<sup>ΔF4/ΔF4</sup> mice at 4 wk (n=4), 5 wk (n=5-6), and 6 wk (n=5). Each symbol represents an individual mouse and bar shows the mean. (D) Shown are histograms of lin<sup>-</sup>CD44<sup>-</sup>CD25<sup>+</sup> DN3 thymocytes in gray and lin<sup>-</sup>CD44<sup>-</sup>CD25<sup>-</sup> DN4 thymocytes in green in 5-wk-old WT and *Ikzf1*<sup>ΔF4/ΔF4</sup> mice. (E) Plotted are ratios of the average cell numbers of the indicated populations in WT over *Ikzf1*<sup>ΔF4/ΔF4</sup> as they relate to age.

**Supplementary Figure S2.** (A) Pearson correlation coefficient (R) matrix of expressed genes >200 bp and ≥4 RPKM in at least one sample (n=10177 genes) for thymocyte subsets from Fig. 4. (B) Pearson correlation coefficient (R) matrix of expressed genes (n=9798 genes) for Notch time course experiment from Fig. 7.

**Supplementary Figure S3.** (A-B) For each gene whose expression changes by a factor of 3-fold or more ( $P \leq 0.001$ ) during any stage transition in WT cells, a ratio of the fold change that occurs in WT cells over the fold change that occurs in *Ikzf1*<sup>ΔF4/ΔF4</sup> cells was calculated. Box plots and corresponding values (minimum, maximum, median, and quartiles) are shown to depict the range of these ratios of fold change between WT and *Ikzf1*<sup>ΔF4/ΔF4</sup> cells. The middle line shows the median, the lower and upper boxes show the 25% and 75% quartiles, and the bottom and top whiskers show the minimum and

maximum. (C-D) The genes from (A-B) were divided into two categories based on whether the absolute ratio of the stage-dependent fold change in WT cells over that in *Ikzf1*<sup>ΔF4/ΔF4</sup> cells was greater than or less than 2. (C) The left panel shows the number of genes and the right panel shows the percentage of genes that fall into the corresponding categories at each stage transition.

**Supplementary Figure S4.** (A) Expressed genes differentially regulated by 3-fold ( $P \leq 0.001$ ) at each stage transition of WT or *Ikzf1*<sup>ΔF4/ΔF4</sup> cells were divided into a variable number of k-means clusters. Colors indicate percentile of relative expression. ETP to DN2 transition, n=796 genes; DN2 to DN3 transition, n=1389 genes; DN3 to DN4 transition, n=345; DN4 to DP transition, n=1568 genes. Shown next to each heat map are graphs of the mean normalized expression values ( $\log_2$  RPKM) for WT and *Ikzf1*<sup>ΔF4/ΔF4</sup> cells in each cluster. The number of genes falling into each cluster is also indicated. (B) Clusters are shown with corresponding gene names.

**Supplementary Figure S5.** Normalized expression values ( $\log_2$  RPKM) for genes of interest involved in hematopoiesis are shown. Table has been adapted from Yui et al. 2010 and Zhang et al. 2012. Colors indicate percentile of relative expression. Fold change and  $P$  values of RPKM values in *Ikzf1*<sup>ΔF4/ΔF4</sup>/WT cells are included, with genes differentially expressed by 2-fold ( $P \leq 0.001$ ) highlighted (upregulated in purple and downregulated in green).

**Supplementary Figure S6.** *Ikzf1*<sup>ΔF4/ΔF4</sup> DN3 cells express IL-7R $\alpha$  at levels intermediate between WT DN3 cells and WT and *Ikzf1*<sup>ΔF4/ΔF4</sup> DN4 cells. Shown are histograms of surface IL-7R $\alpha$  protein expression on DN3 and DN4 cells of WT and *Ikzf1*<sup>ΔF4/ΔF4</sup> mice.

**Supplementary Figure S7.** Loss of finger 4 of Ikaros enhances gene expression changes resulting from activated Notch. (A) Hierarchical clustering of expressed genes (>200 bp,  $\geq 4$  RPKM in at least one sample) differentially regulated by 3-fold ( $P \leq 0.001$ ) between ICN-GFP<sup>+</sup> and ICN-GFP<sup>-</sup> cells and differentially regulated by 5-fold ( $P \leq 0.001$ ) in any time point relative to day 0 (n=294). (B) Genes in (A) were divided into 6 k-means clusters. Shown are graphs of the mean normalized expression values ( $\log_2$  RPKM) in WT and *Ikzf1* <sup>$\Delta F4/\Delta F4$</sup>  cells for each cluster.

**Supplementary Figure S8.** List of genes upregulated in *Ikzf1* <sup>$\Delta F4/\Delta F4$</sup>  cells compared to WT cells for thymocytes (ETP, DN2, DN3, DN4, or DP), for Notch-expressing cells (ICN-GFP<sup>+</sup> cells at day 2, 4, or 7), and for BCR-ABL-expressing cells (day 14, 21, or 28). Shown are fold changes of *Ikzf1* <sup>$\Delta F4/\Delta F4$</sup> /WT RPKM values in each dataset. Fold change values are highlighted in purple if the gene is upregulated in the mutant cells by 3-fold or greater ( $\geq 4$  RPKM,  $P \leq 0.001$  for thymocyte or Notch-expressing cells,  $P \leq 0.02$  for BCR-ABL-expressing cells) in the indicated dataset.

**Supplementary Figure S9.** List of genes downregulated in *Ikzf1* <sup>$\Delta F4/\Delta F4$</sup>  cells compared to WT cells for thymocytes (ETP, DN2, DN3, DN4, or DP), for Notch-expressing cells (ICN-GFP<sup>+</sup> cells at day 2, 4, or 7), and for BCR-ABL-expressing cells (day 14, 21, or 28). Shown are fold changes of WT/*Ikzf1* <sup>$\Delta F4/\Delta F4$</sup>  RPKM values in each dataset. Fold change values are highlighted in green if the gene is downregulated in the mutant cells by 3-fold or greater ( $\geq 4$  RPKM,  $P \leq 0.001$  for thymocyte or Notch-expressing cells,  $P \leq 0.02$  for BCR-ABL-expressing cells) in the indicated dataset.

**Supplementary Figure S10.** Gene ontology analysis of genes upregulated or downregulated by 3-fold in *Ikzf1*<sup>ΔF4/ΔF4</sup> cells compared to WT cells in all datasets (thymocytes, Notch-expressing cells, and BCR-Abl cells).

Yui MA, Feng N, Rothenberg E V. 2010. Fine-scale staging of T cell lineage commitment in adult mouse thymus. *J Immunol* **185**: 284–93.

Zhang JA, Mortazavi A, Williams BA, Wold BJ, Rothenberg E V. 2012. Dynamic transformations of genome-wide epigenetic marking and transcriptional control establish T cell identity. *Cell* **149**: 467–482.

**A**

|         | 4-wk-old                |                                 |             | 5-wk-old                |                                 |             | 6-wk-old                |                                 |             |
|---------|-------------------------|---------------------------------|-------------|-------------------------|---------------------------------|-------------|-------------------------|---------------------------------|-------------|
|         | WT                      | <i>Ikzf1</i> <sup>ΔF4/ΔF4</sup> | Ratio       | WT                      | <i>Ikzf1</i> <sup>ΔF4/ΔF4</sup> | Ratio       | WT                      | <i>Ikzf1</i> <sup>ΔF4/ΔF4</sup> | Ratio       |
| ETP     | 31.8 × 10 <sup>3</sup>  | 2.3 × 10 <sup>3</sup>           | <b>13.8</b> | 38.0 × 10 <sup>3</sup>  | 3.9 × 10 <sup>3</sup>           | <b>9.7</b>  | 41.6 × 10 <sup>3</sup>  | 5.7 × 10 <sup>3</sup>           | <b>7.3</b>  |
| DN2     | 167.0 × 10 <sup>3</sup> | 14.9 × 10 <sup>3</sup>          | <b>11.2</b> | 131.5 × 10 <sup>3</sup> | 6.4 × 10 <sup>3</sup>           | <b>20.6</b> | 104.6 × 10 <sup>3</sup> | 2.4 × 10 <sup>3</sup>           | <b>43.5</b> |
| DN3     | 216.7 × 10 <sup>4</sup> | 63.5 × 10 <sup>4</sup>          | <b>3.4</b>  | 223.4 × 10 <sup>4</sup> | 27.7 × 10 <sup>4</sup>          | <b>8.0</b>  | 199.1 × 10 <sup>4</sup> | 7.4 × 10 <sup>4</sup>           | <b>26.9</b> |
| DN4     | 369.3 × 10 <sup>4</sup> | 247.8 × 10 <sup>4</sup>         | <b>1.5</b>  | 343.3 × 10 <sup>4</sup> | 169.6 × 10 <sup>4</sup>         | <b>2.0</b>  | 280.9 × 10 <sup>4</sup> | 99.1 × 10 <sup>4</sup>          | <b>2.8</b>  |
| CD8-ISP | 11.2 × 10 <sup>5</sup>  | 3.0 × 10 <sup>5</sup>           | <b>3.8</b>  | 11.7 × 10 <sup>5</sup>  | 5.4 × 10 <sup>5</sup>           | <b>2.2</b>  | 5.7 × 10 <sup>5</sup>   | 1.4 × 10 <sup>5</sup>           | <b>4.2</b>  |
| CD4-ISP | 3.6 × 10 <sup>5</sup>   | 9.4 × 10 <sup>5</sup>           | <b>0.4</b>  | 5.6 × 10 <sup>5</sup>   | 4.5 × 10 <sup>5</sup>           | <b>1.2</b>  | 5.4 × 10 <sup>5</sup>   | 4.5 × 10 <sup>5</sup>           | <b>1.2</b>  |
| DP      | 18.1 × 10 <sup>7</sup>  | 7.2 × 10 <sup>7</sup>           | <b>2.5</b>  | 16.6 × 10 <sup>7</sup>  | 5.7 × 10 <sup>7</sup>           | <b>2.9</b>  | 14.4 × 10 <sup>7</sup>  | 3.0 × 10 <sup>7</sup>           | <b>4.8</b>  |
| CD8 SP  | 2.7 × 10 <sup>6</sup>   | 3.3 × 10 <sup>6</sup>           | <b>0.8</b>  | 3.0 × 10 <sup>6</sup>   | 3.6 × 10 <sup>6</sup>           | <b>0.8</b>  | 2.7 × 10 <sup>6</sup>   | 3.1 × 10 <sup>6</sup>           | <b>0.8</b>  |
| CD4 SP  | 12.0 × 10 <sup>6</sup>  | 11.3 × 10 <sup>6</sup>          | <b>1.1</b>  | 12.1 × 10 <sup>6</sup>  | 10.8 × 10 <sup>6</sup>          | <b>1.1</b>  | 10.1 × 10 <sup>6</sup>  | 5.6 × 10 <sup>6</sup>           | <b>1.8</b>  |

**B**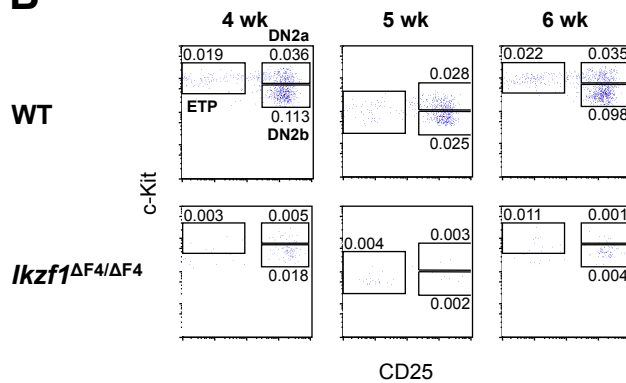**C**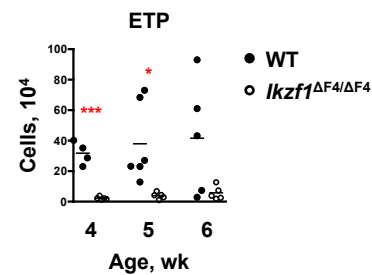**D**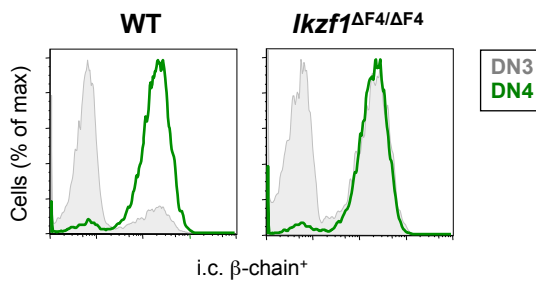**E**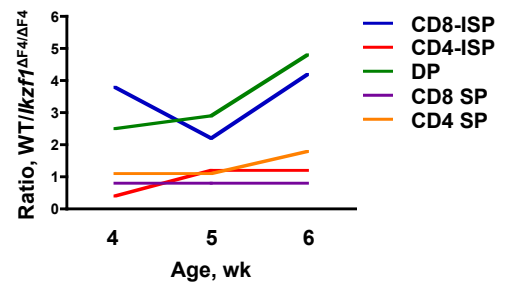



**A**

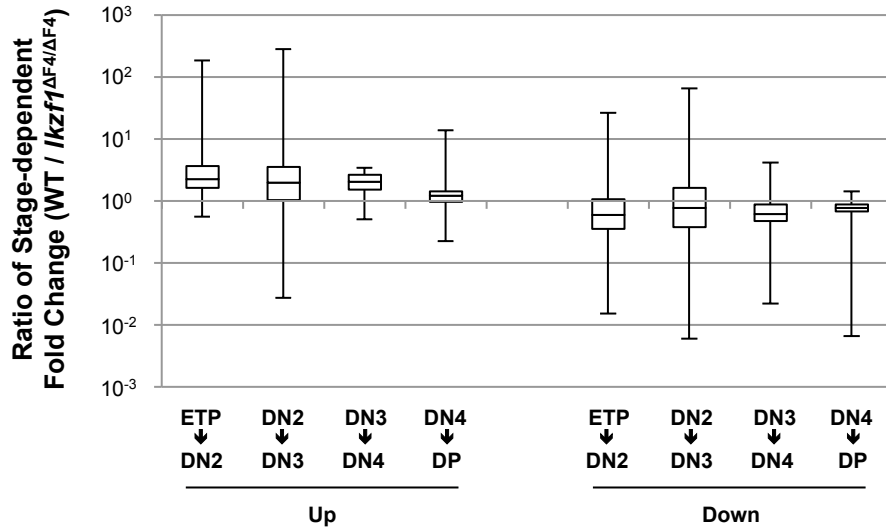

**B**

|              | Up        |           |           |          | Down      |           |           |          |
|--------------|-----------|-----------|-----------|----------|-----------|-----------|-----------|----------|
|              | ETP → DN2 | DN2 → DN3 | DN3 → DN4 | DN4 → DP | ETP → DN2 | DN2 → DN3 | DN3 → DN4 | DN4 → DP |
| Minimum      | 0.6       | 0.0       | 0.5       | 0.2      | 0.0       | 0.0       | 0.0       | 0.0      |
| 25% Quartile | 1.6       | 1.0       | 1.5       | 1.0      | 0.4       | 0.4       | 0.5       | 0.7      |
| Median       | 2.3       | 1.9       | 2.0       | 1.2      | 0.6       | 0.8       | 0.6       | 0.8      |
| 75% Quartile | 3.6       | 3.5       | 2.7       | 1.4      | 1.1       | 1.6       | 0.9       | 0.9      |
| Maximum      | 184.8     | 284.5     | 3.5       | 13.6     | 26.7      | 65.0      | 4.2       | 1.4      |

**C**

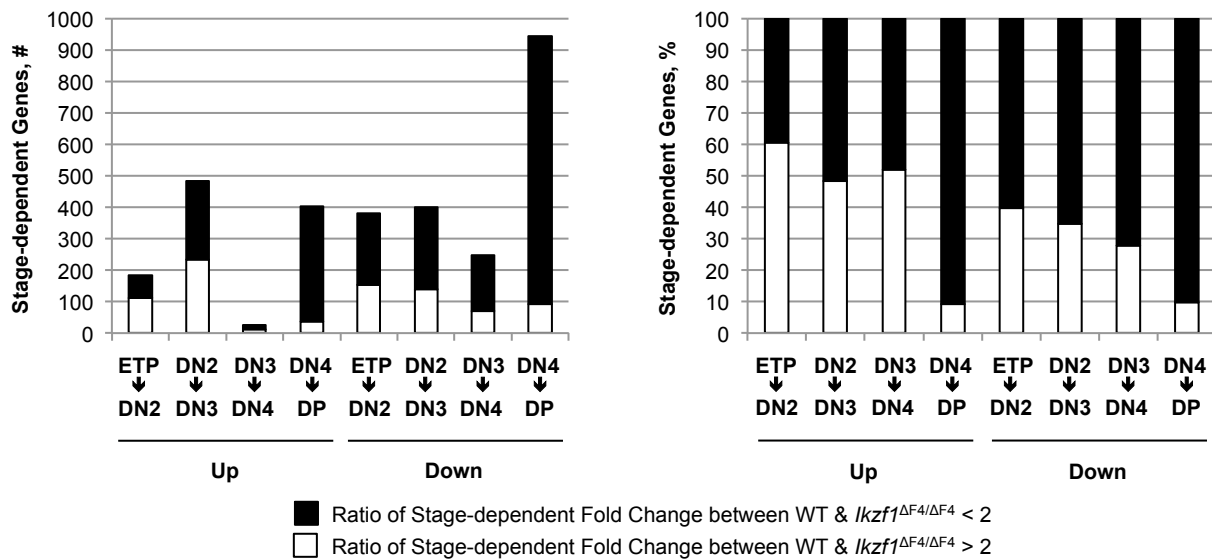

**D**

|      |           | FC ratio >2 |    | FC ratio <2 |    |
|------|-----------|-------------|----|-------------|----|
|      |           | #           | %  | #           | %  |
| UP   | ETP → DN2 | 112         | 61 | 73          | 39 |
|      | DN2 → DN3 | 233         | 48 | 250         | 52 |
|      | DN3 → DN4 | 13          | 52 | 12          | 48 |
|      | DN4 → DP  | 37          | 9  | 366         | 91 |
| DOWN | ETP → DN2 | 152         | 40 | 230         | 60 |
|      | DN2 → DN3 | 139         | 35 | 260         | 65 |
|      | DN3 → DN4 | 69          | 28 | 178         | 72 |
|      | DN4 → DP  | 93          | 10 | 851         | 90 |

**A**

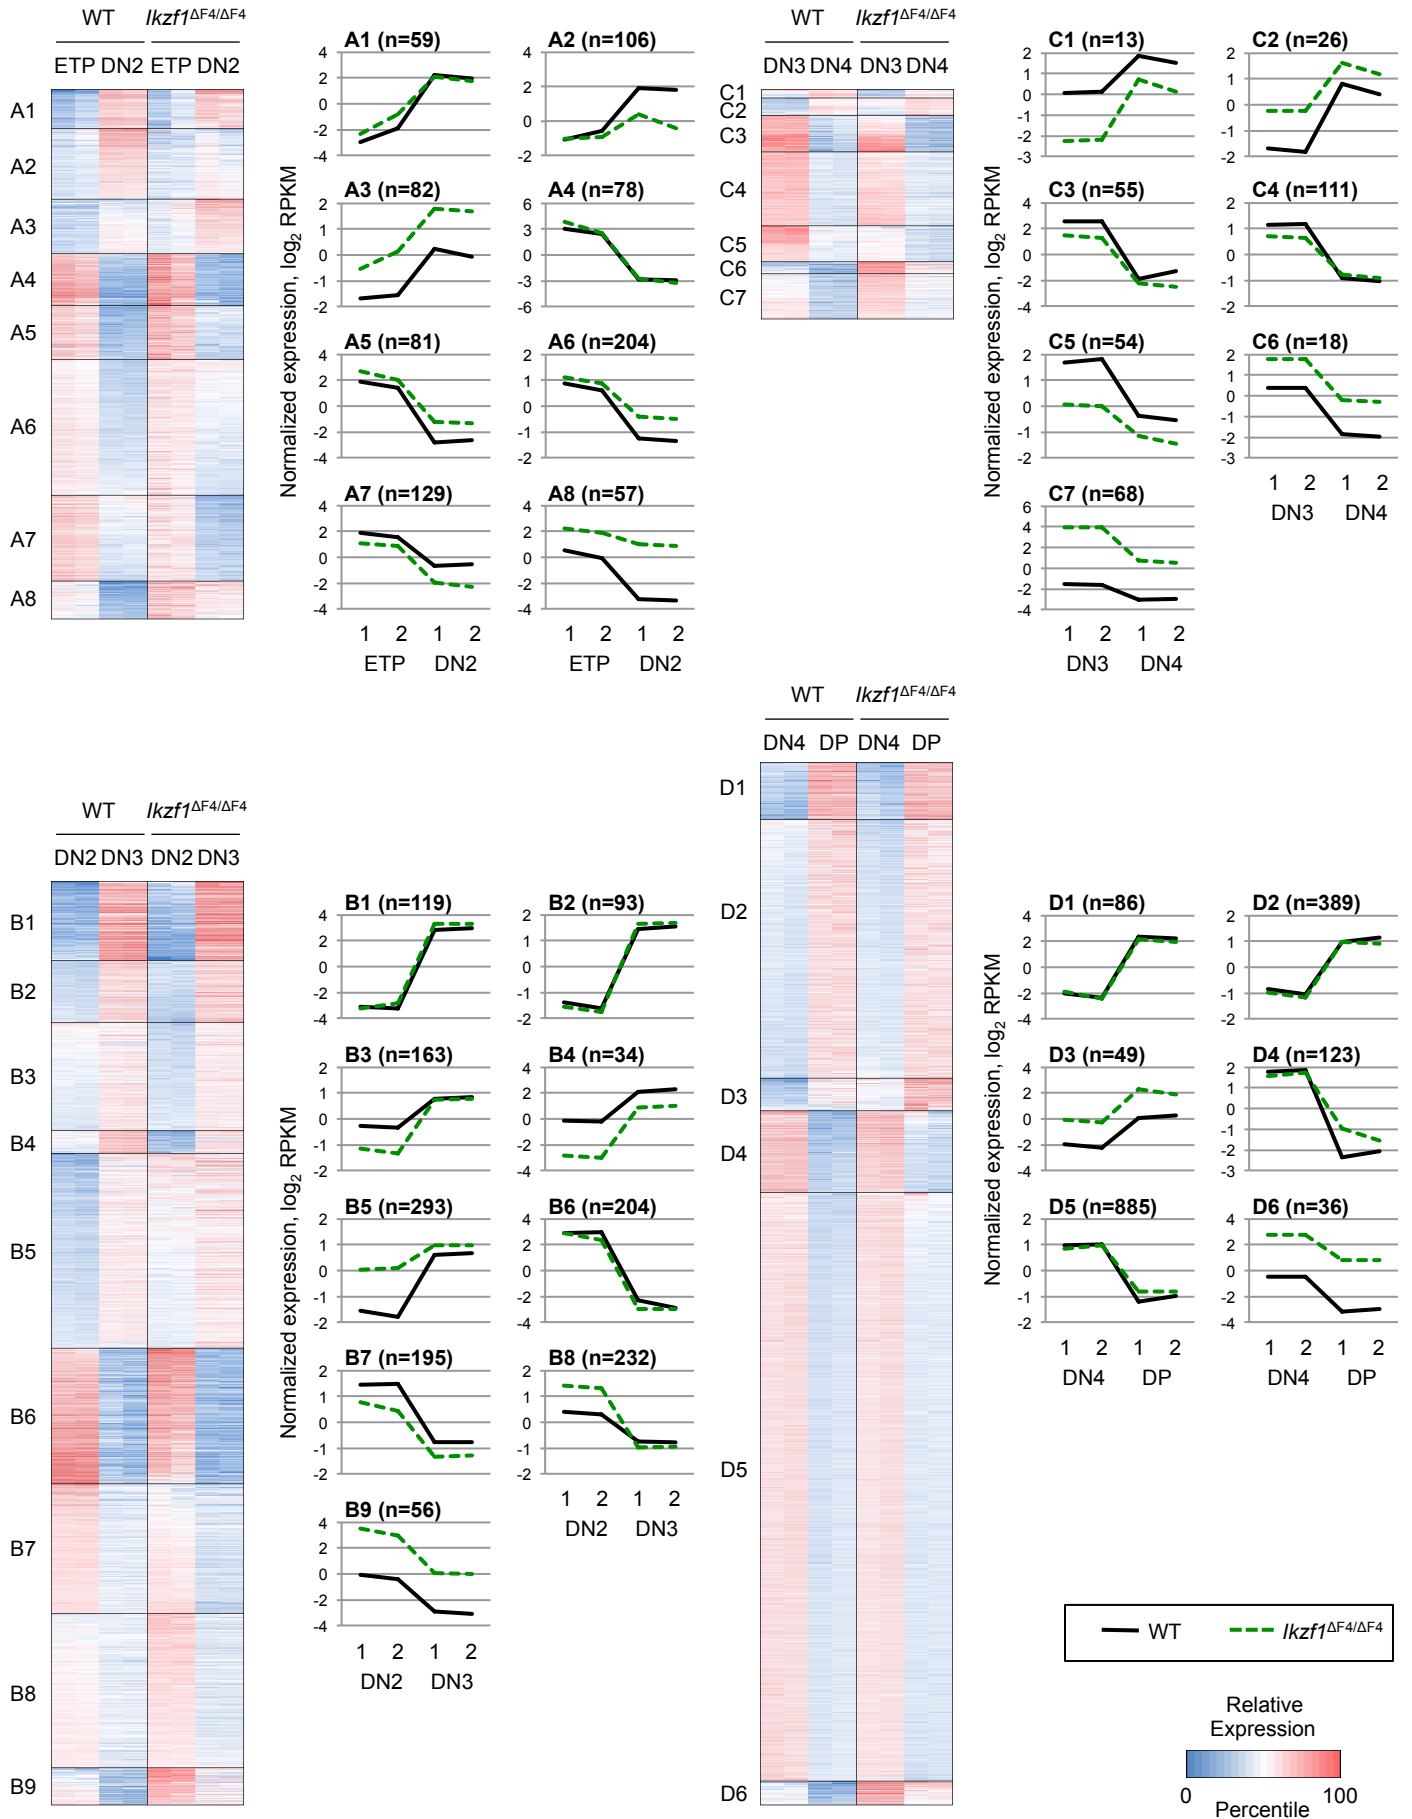



B

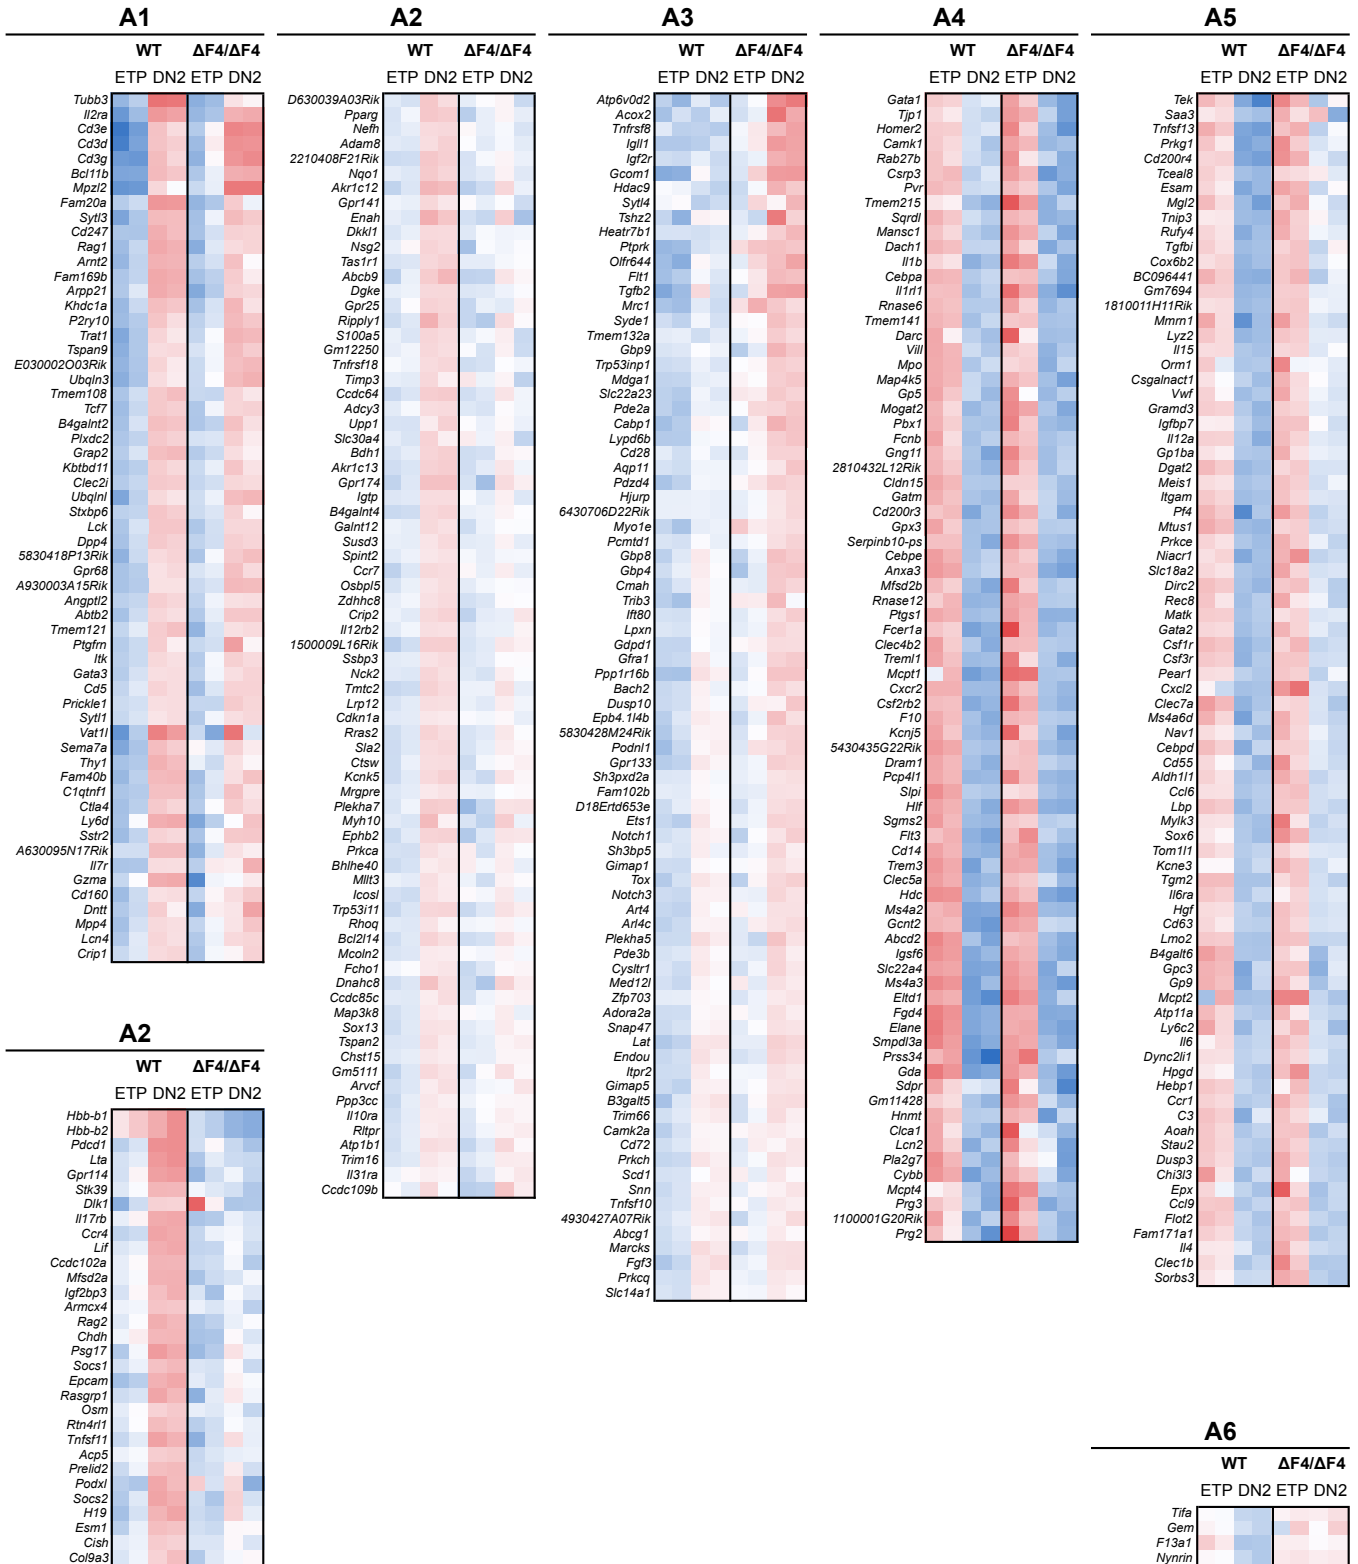



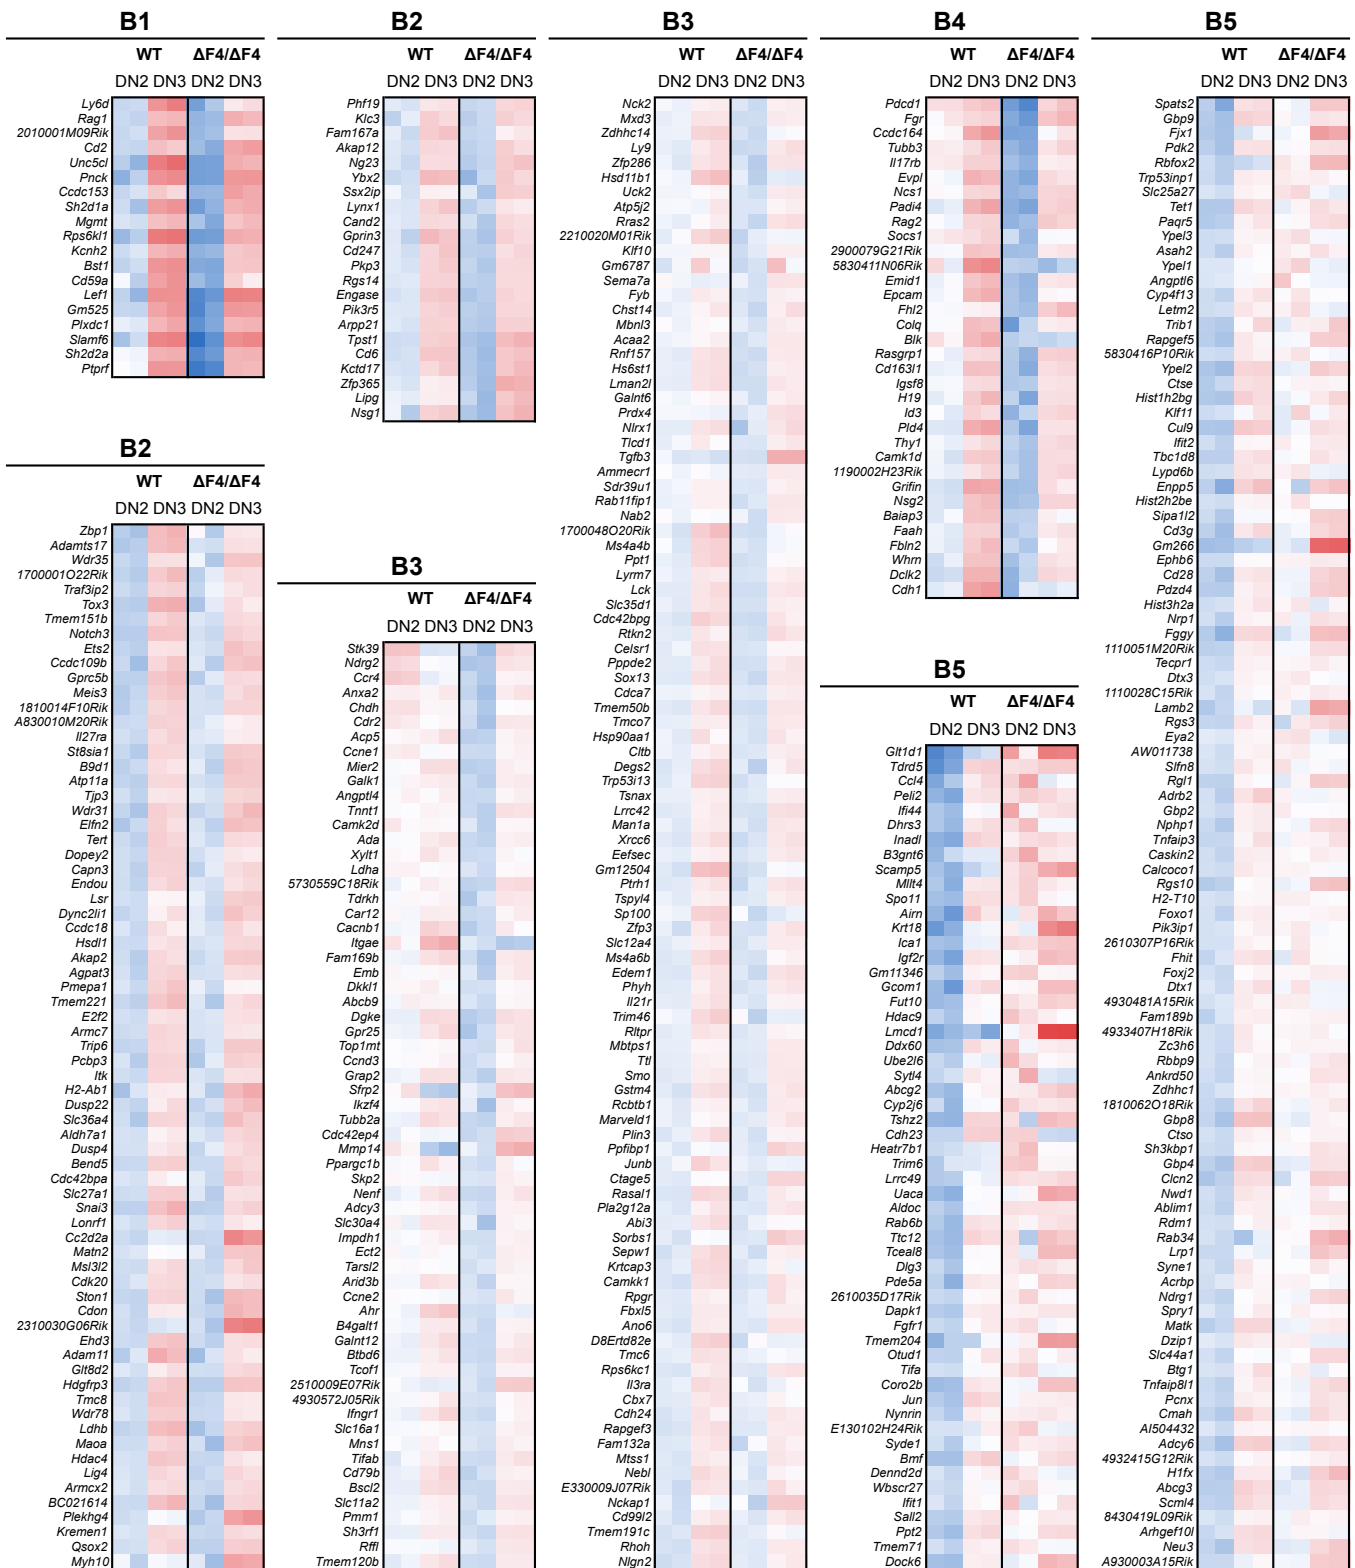

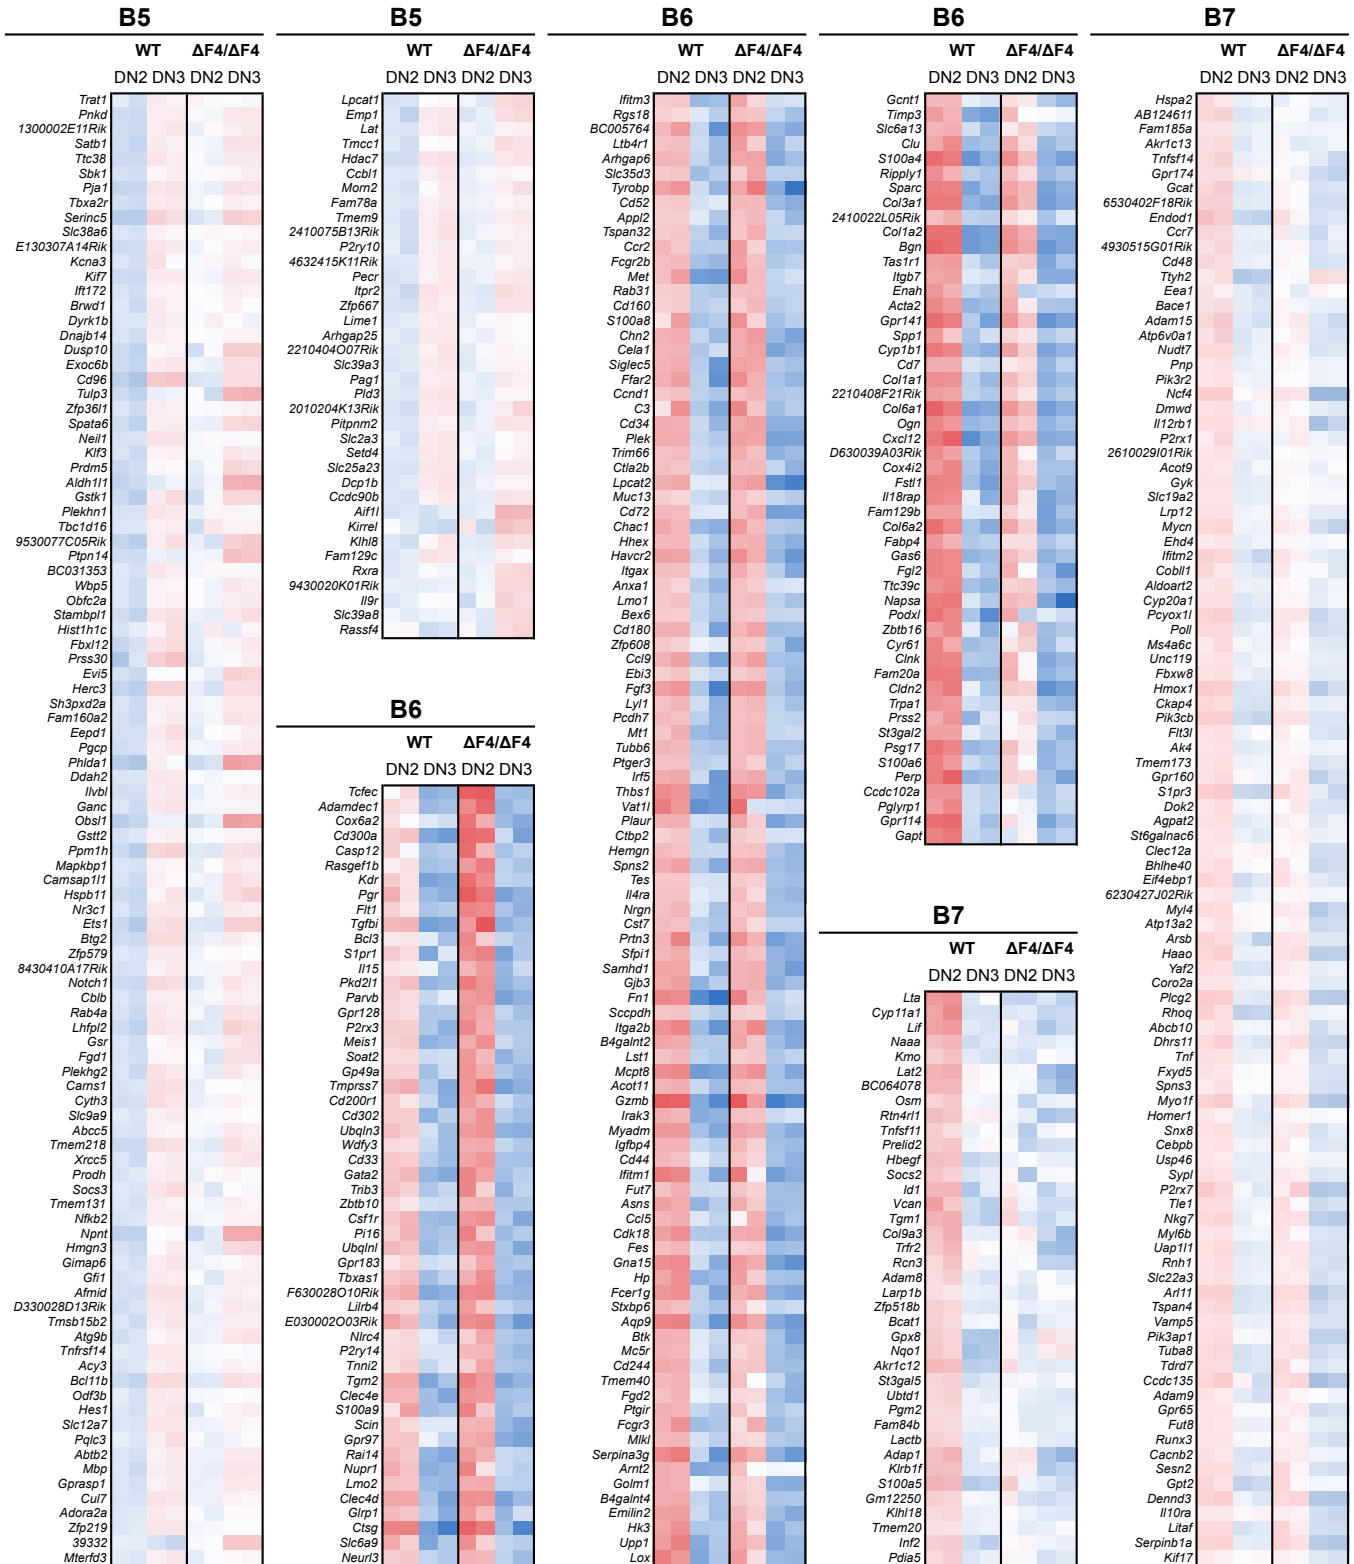

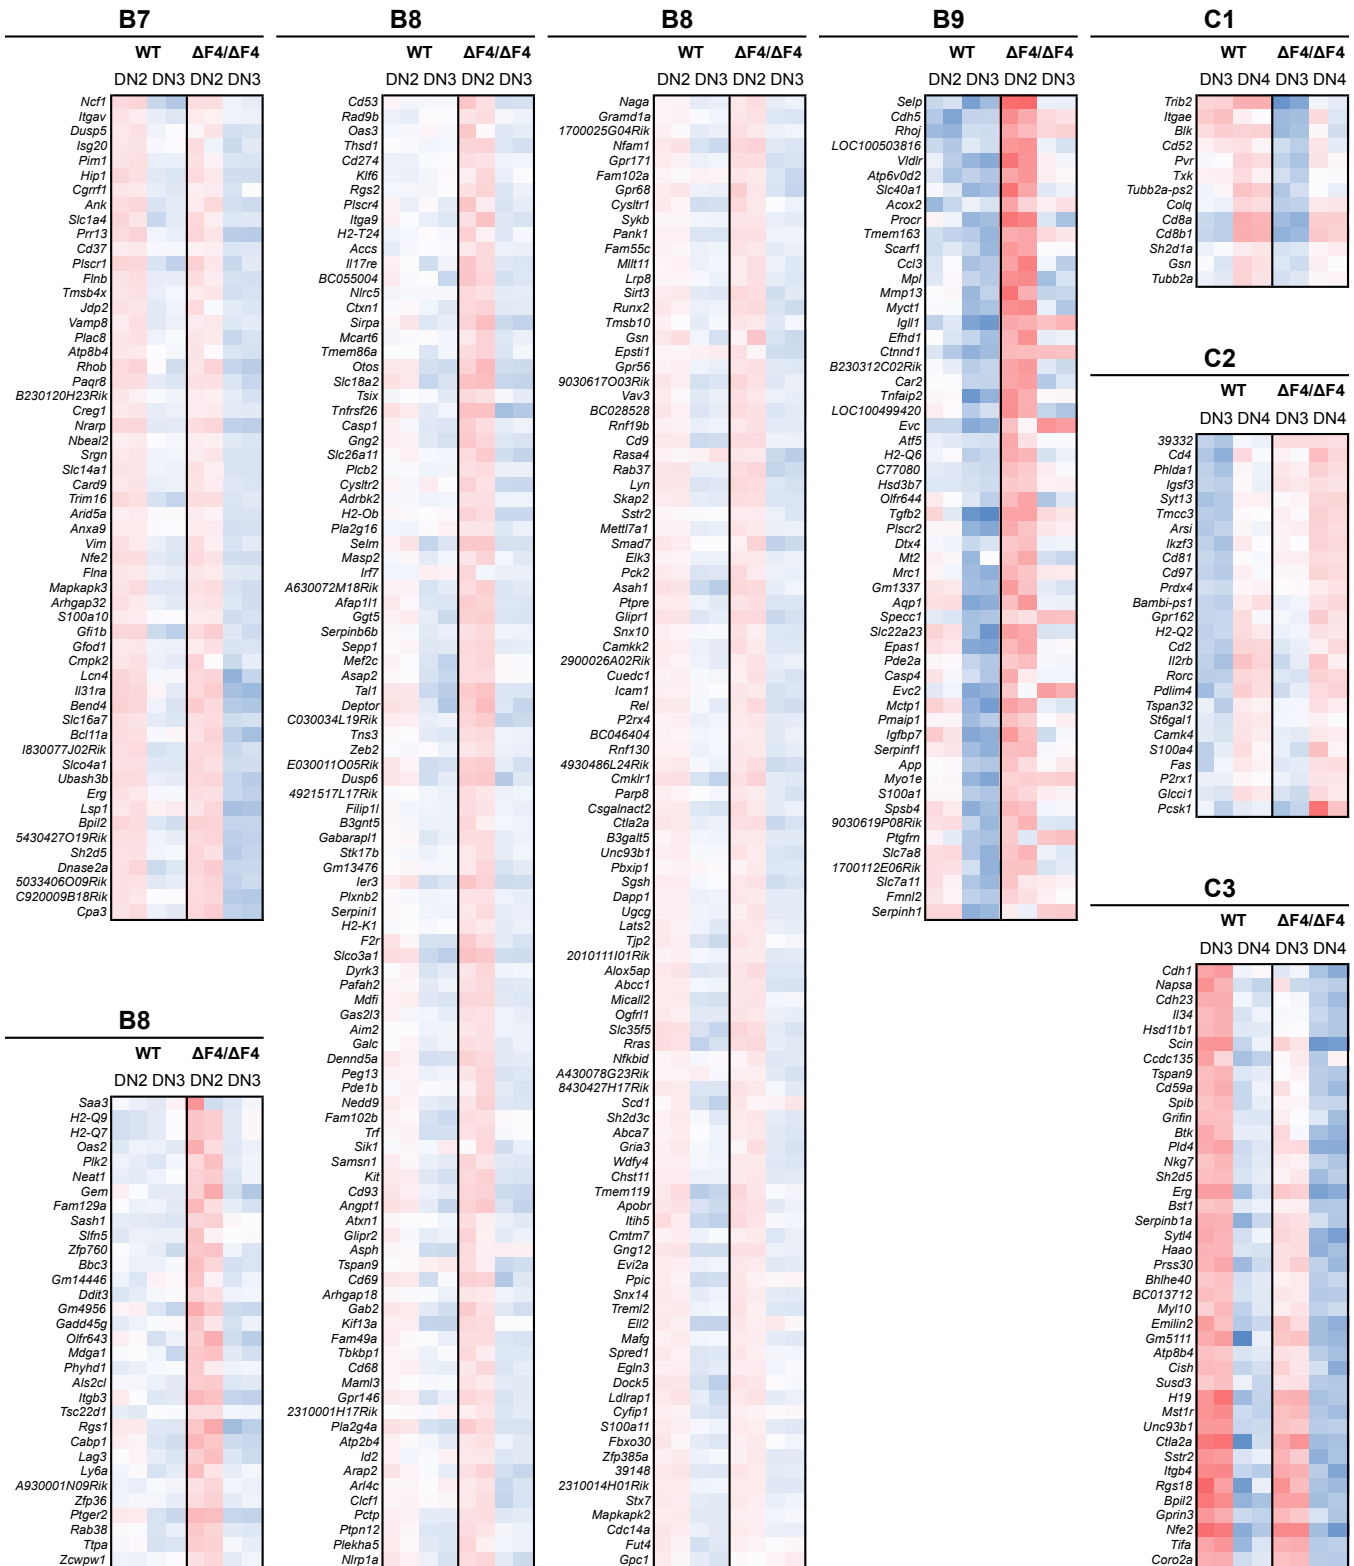

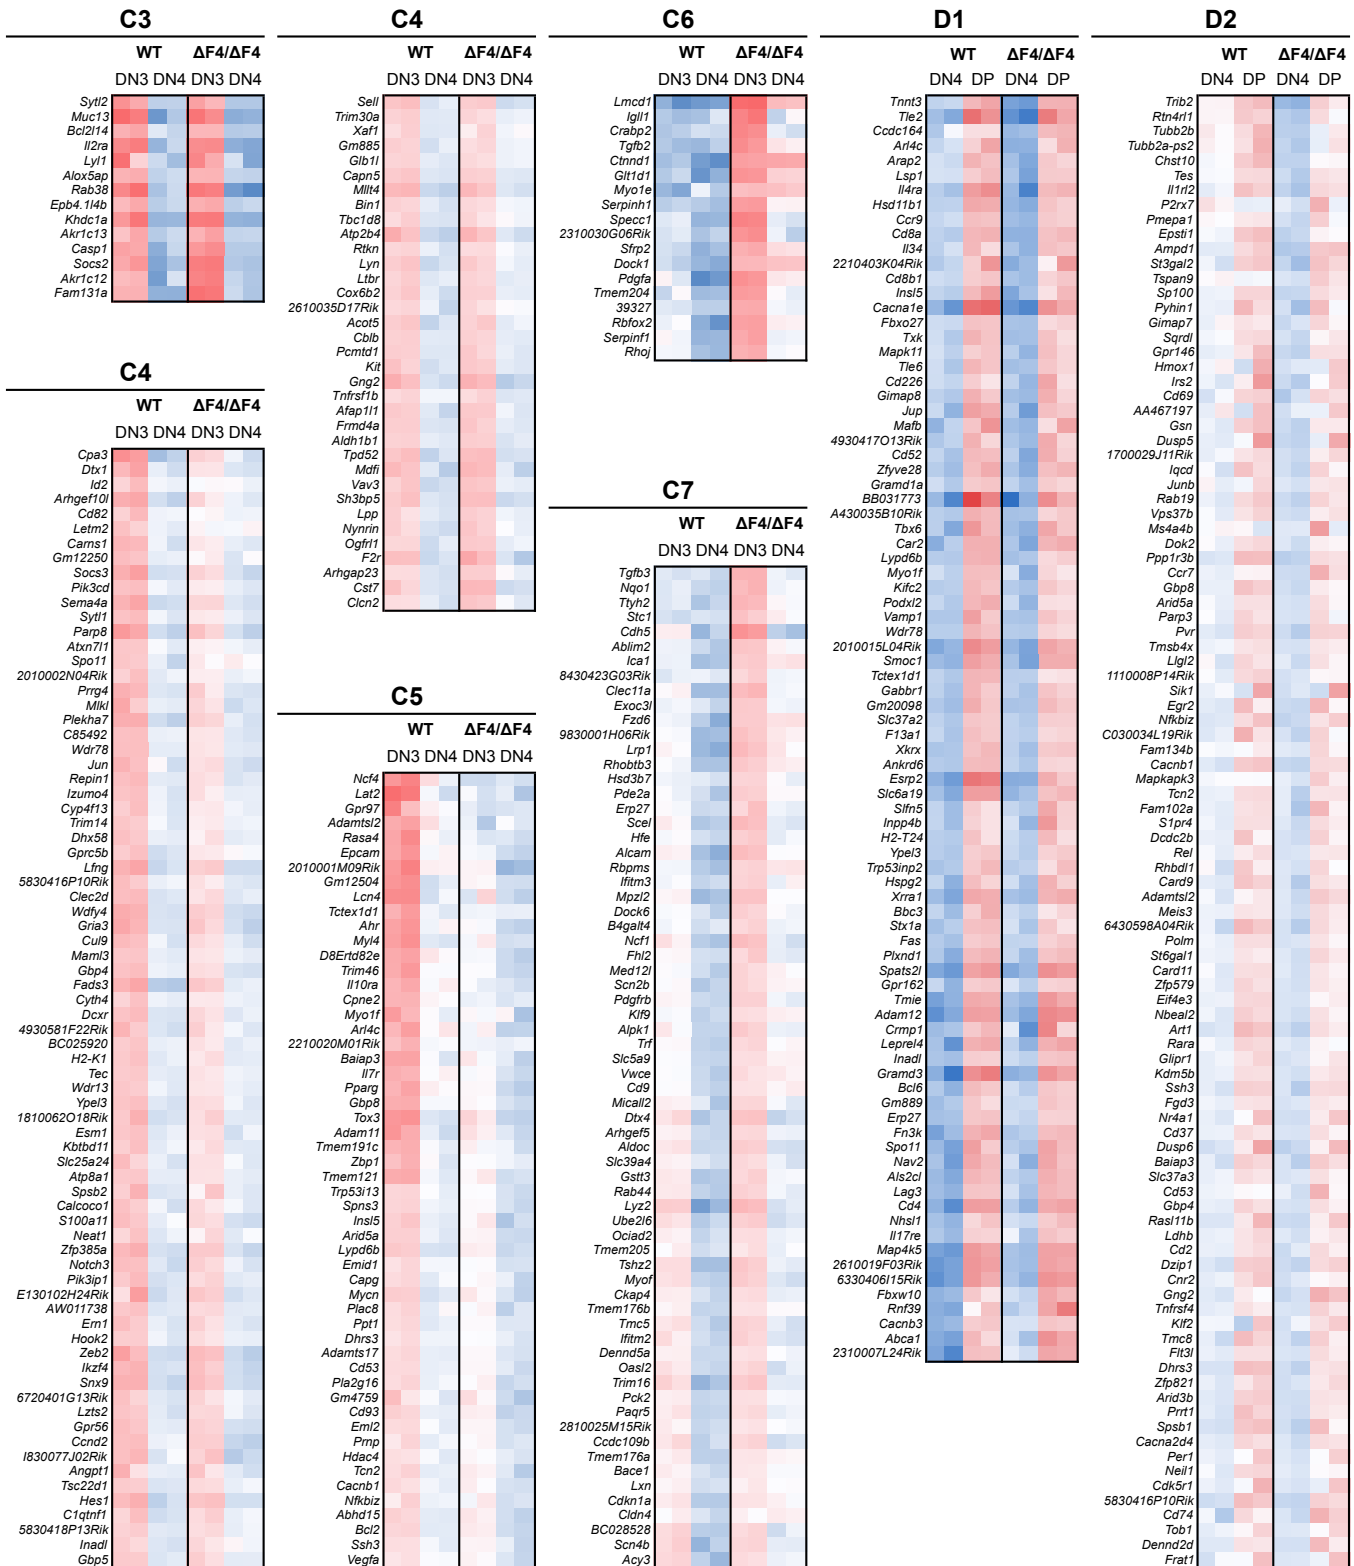

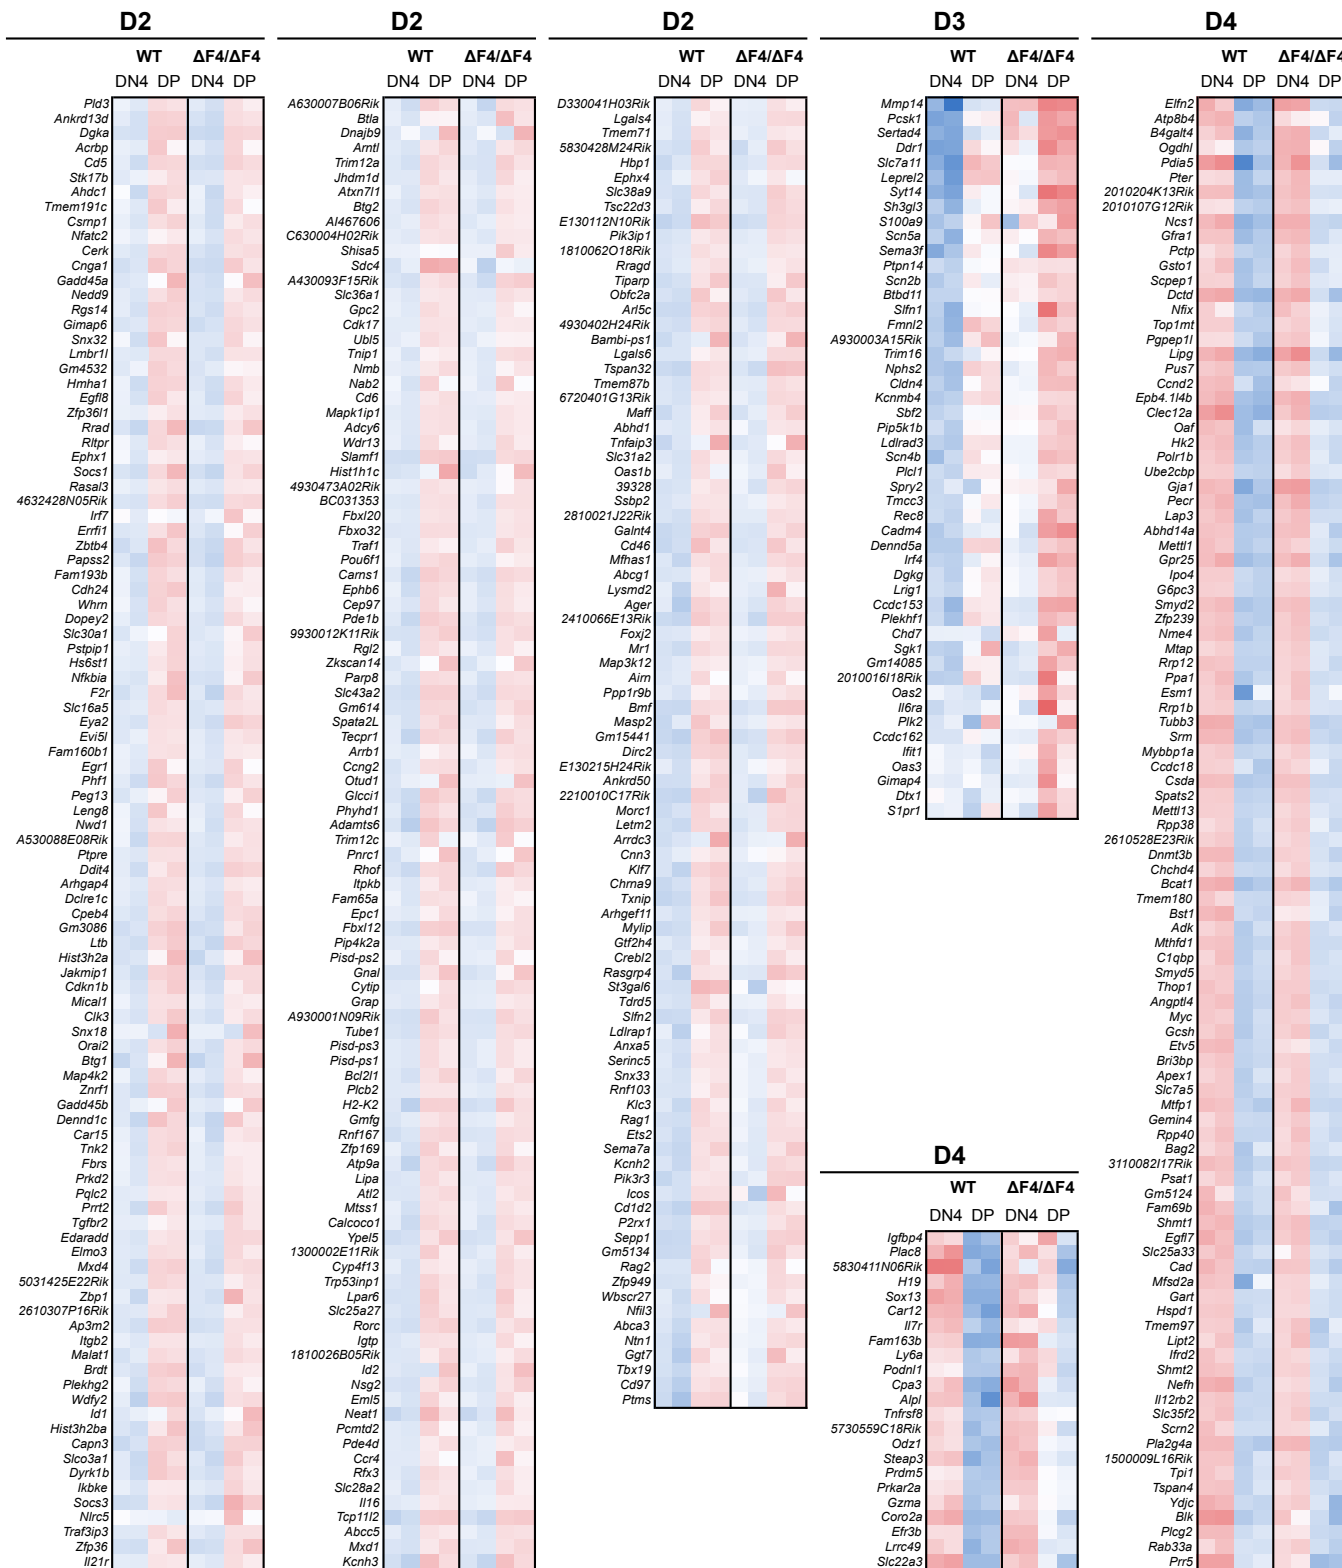

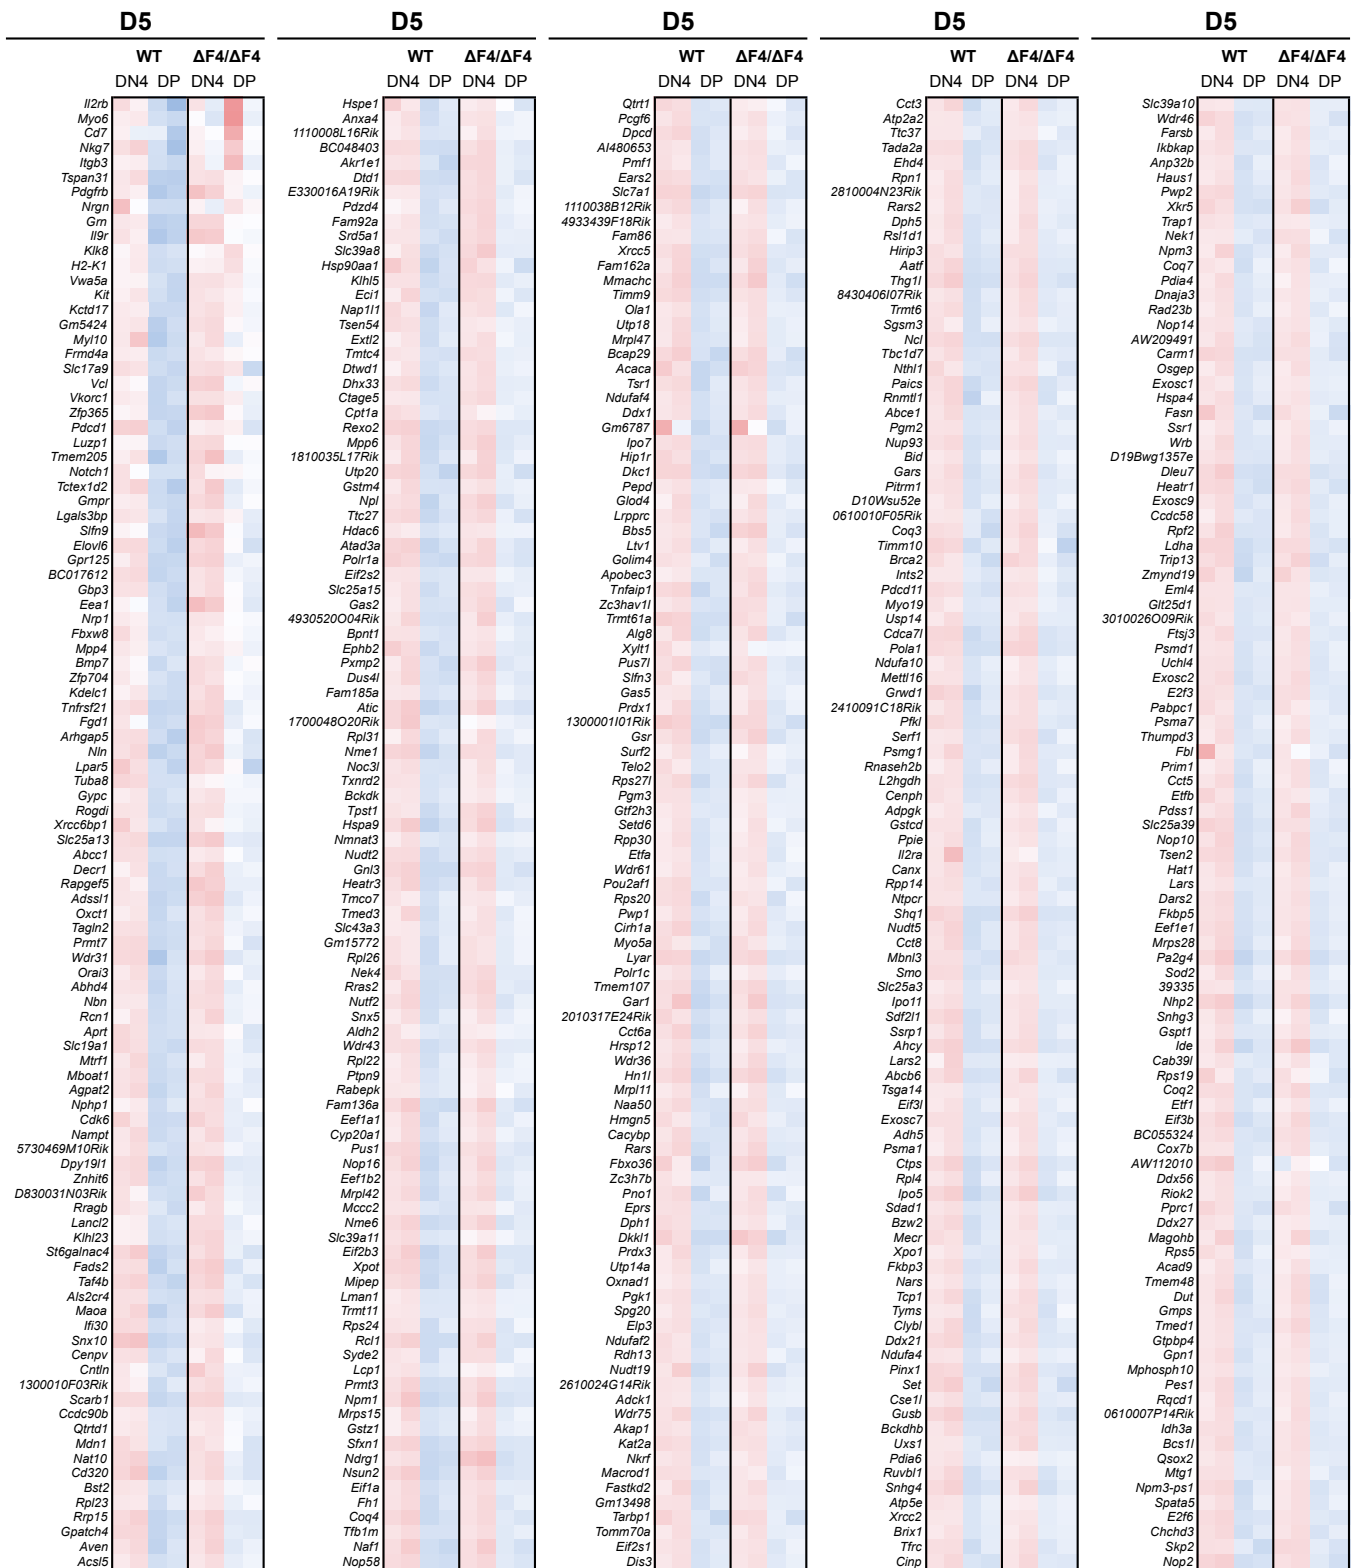





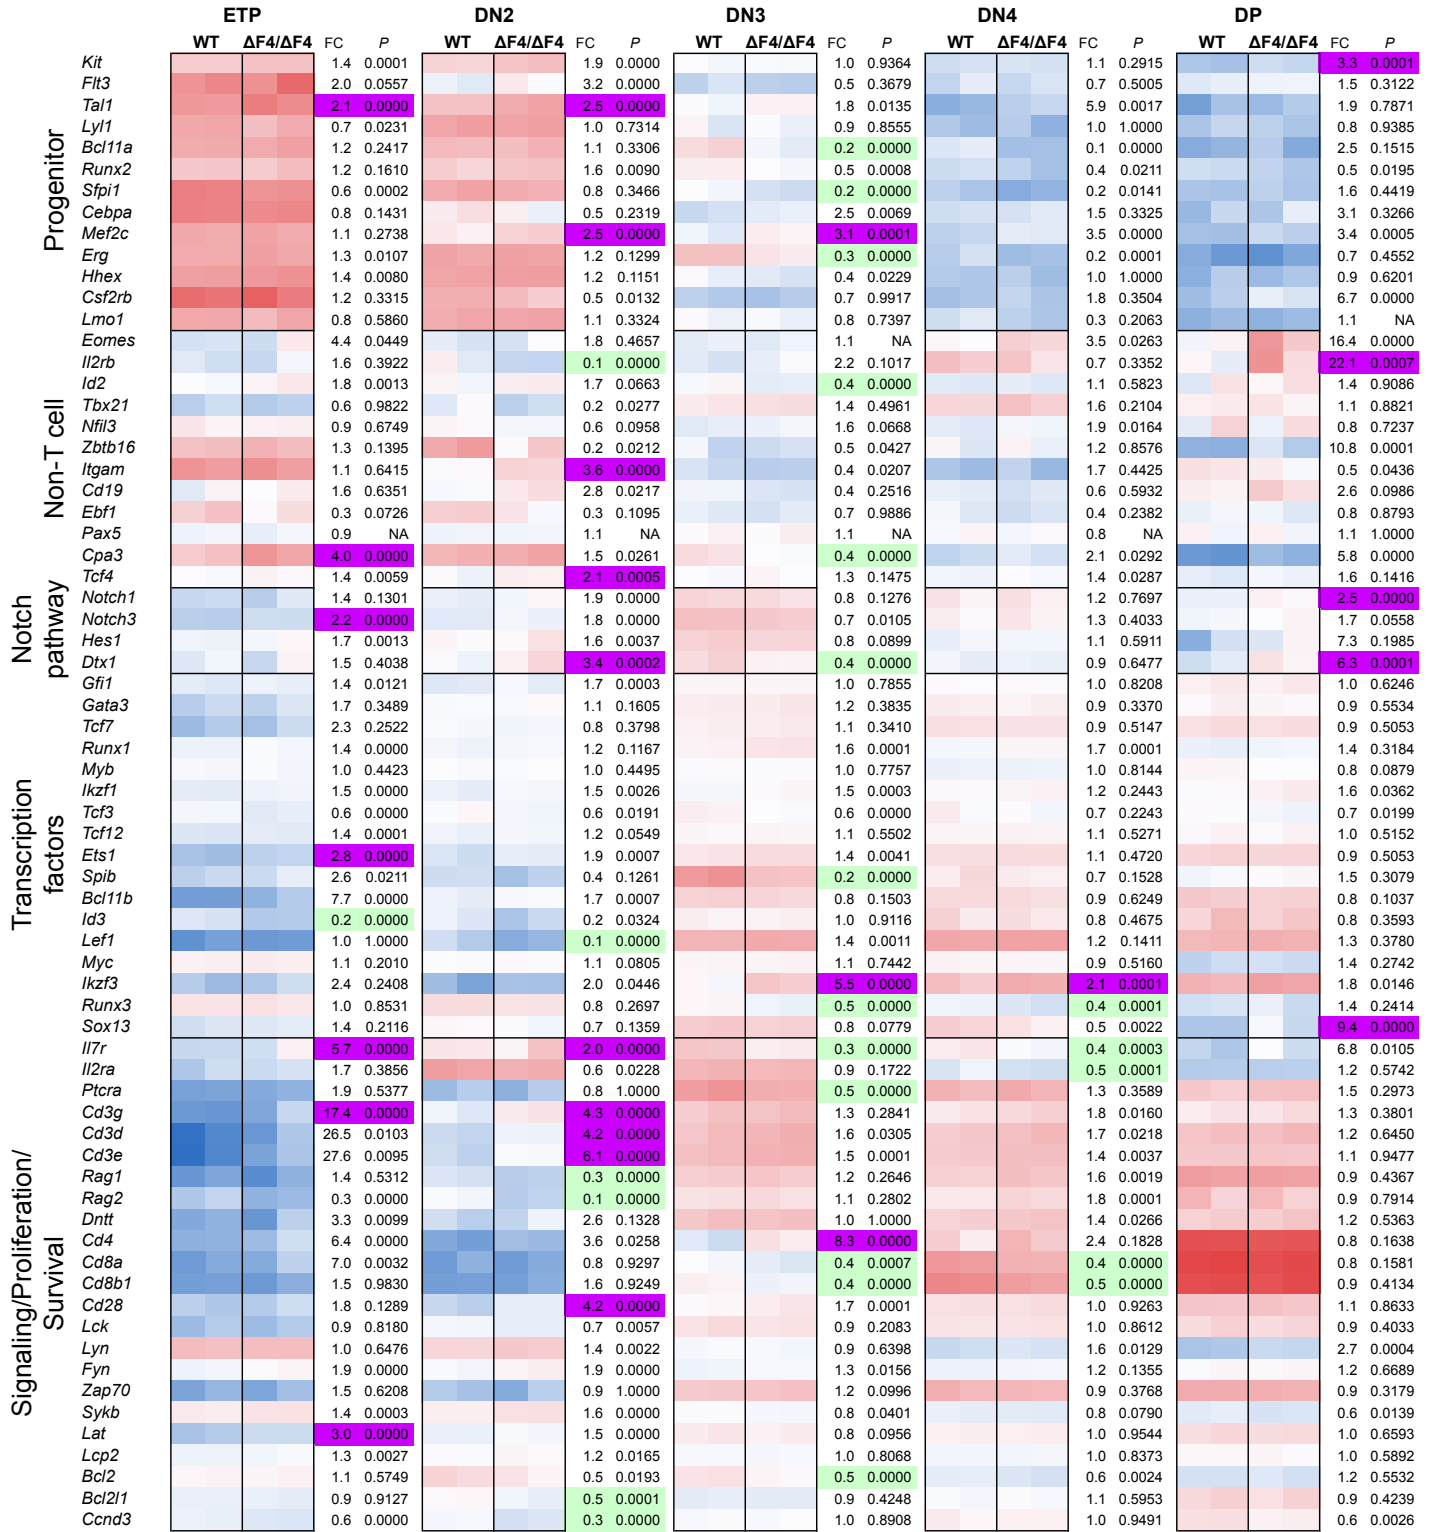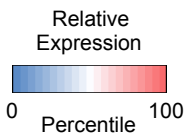

twofold up,  $P \leq 0.001$ ,  $\geq 1$  RPKM

twofold down,  $P \$

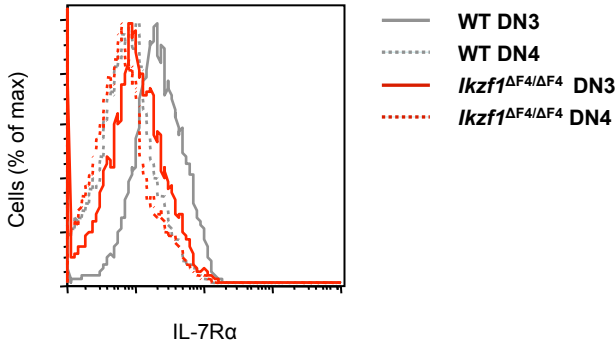

A

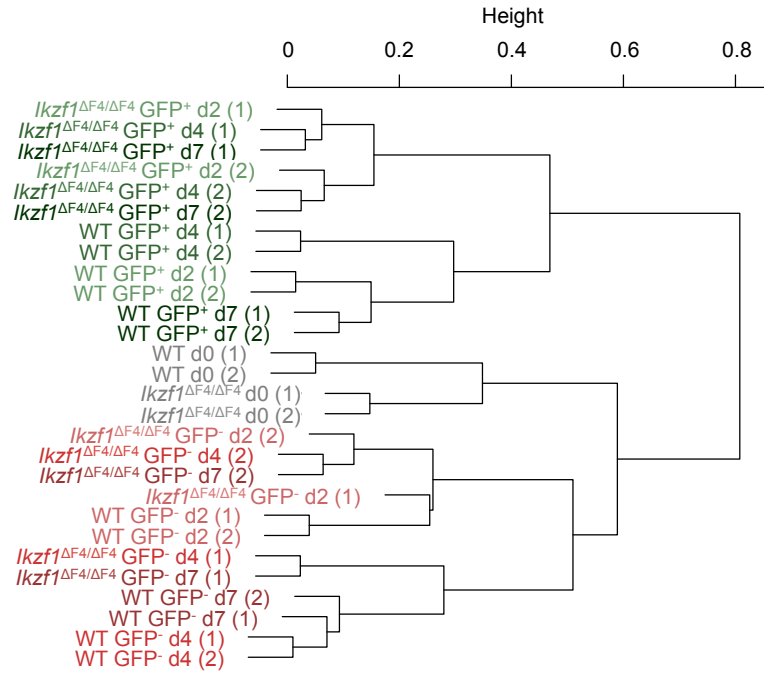

B

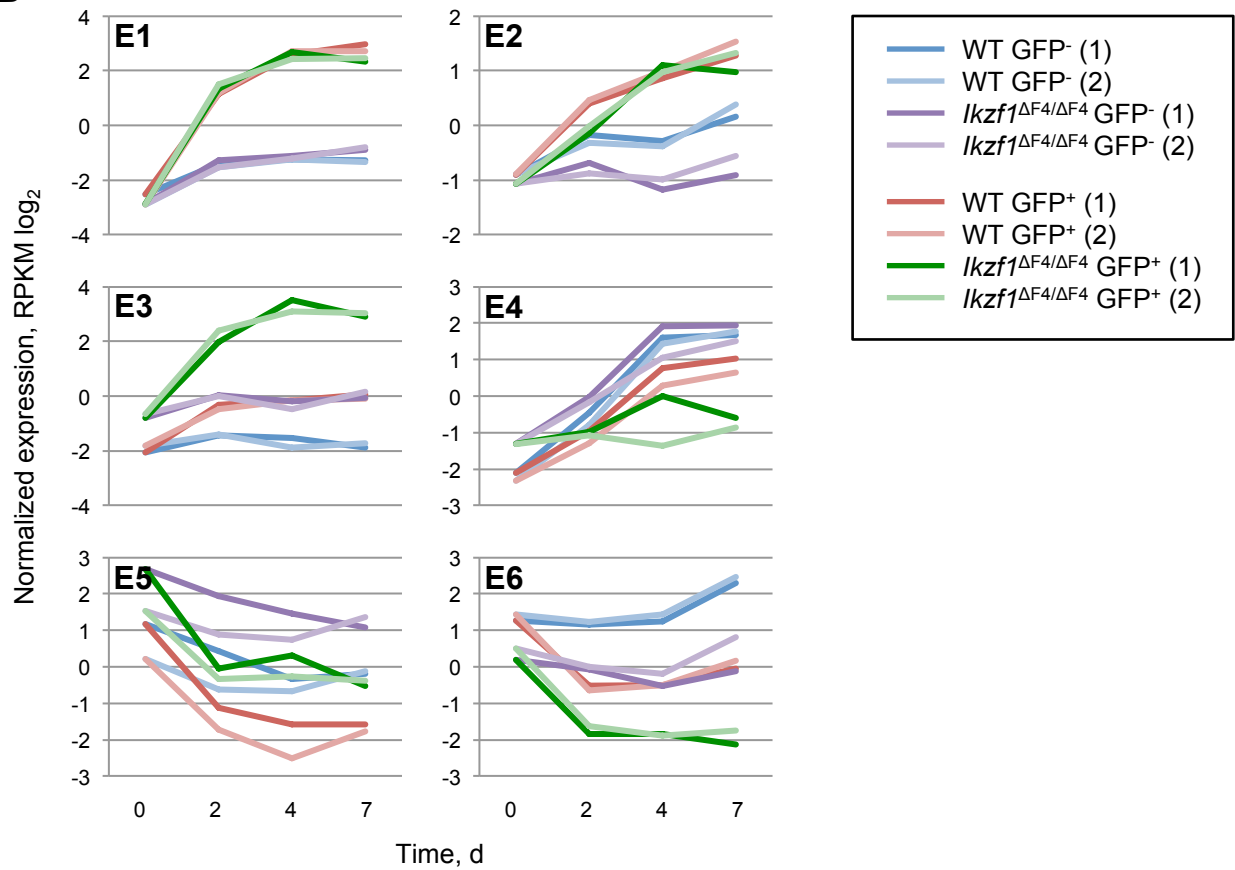

Up in *Ikzf1*<sup>ΔF4/ΔF4</sup> Thy, Notch, and BCR-ABL

| Gene Name     | Thy   | Notch | BCR-ABL |
|---------------|-------|-------|---------|
| Lyplal1       | 16.6  | 48.3  | 15.4    |
| Dock1         | 245.5 | 45.9  | 35.3    |
| Ctnnd1        | 260.8 | 43.4  | 3.8     |
| Uaca          | 11.0  | 38.3  | 4.3     |
| Lamb2         | 21.9  | 32.0  | 10.2    |
| Rbpms         | 38.9  | 26.7  | 6.6     |
| Dock7         | 59.6  | 25.3  | 11.7    |
| Tmem132a      | 9.0   | 22.7  | 34.1    |
| Gria2         | 35.2  | 18.6  | 5.5     |
| Tmem176b      | 10.5  | 15.9  | 7.2     |
| S1pr1         | 6.0   | 14.8  | 4.1     |
| Tmem176a      | 10.5  | 13.3  | 4.9     |
| Rxra          | 3.8   | 6.6   | 3.8     |
| Sbf2          | 5.2   | 5.7   | 4.9     |
| Sh3gl3        | 16.2  | 5.3   | 56.3    |
| Ppic          | 15.7  | 5.0   | 12.6    |
| 9830001H06Rik | 12.2  | 4.3   | 6.4     |
| Myh10         | 12.1  | 3.7   | 3.5     |
| Tfpi          | 4.1   | 3.6   | 38.0    |

 > 10-fold up

 3- to 10-fold up

Up in *Ikzf1*<sup>ΔF4/ΔF4</sup> Thy and BCR-ABL

| Gene Name | Thy   | Notch | BCR-ABL |
|-----------|-------|-------|---------|
| H19       | 10.9  | 1.0   | 1529.4  |
| Gzmb      | 28.8  | 0.4   | 193.9   |
| Aqp1      | 11.6  | 3.7   | 61.5    |
| Spats2    | 6.8   | 1.0   | 36.5    |
| Serpinh1  | 70.3  | 1.4   | 29.1    |
| Smpd3b    | 17.9  | 2.5   | 24.1    |
| Rhoj      | 129.2 | 5.0   | 21.3    |
| Stk39     | 6.2   | 2.0   | 19.7    |
| Ccl2      | 4.0   | 1.4   | 16.8    |
| Gem       | 6.9   | 1.1   | 12.2    |
| Fam129a   | 6.7   | 0.9   | 11.9    |
| Exoc3l    | 7.8   | 4.0   | 11.0    |
| Kctd17    | 3.2   | 2.6   | 9.7     |
| Hdac9     | 16.8  | 2.1   | 8.8     |
| Ptms      | 3.9   | 1.5   | 8.8     |
| Slc6a9    | 3.3   | 1.0   | 8.0     |
| H2-Aa     | 9.2   | 2.5   | 7.7     |
| Ifitm3    | 7.5   | 3.5   | 7.4     |
| Pdzd4     | 8.1   | 2.1   | 7.1     |
| Pak1      | 5.0   | 2.0   | 6.8     |
| Cth       | 6.1   | 0.1   | 6.6     |
| Mt2       | 8.5   | 2.0   | 6.6     |
| Igf1p4    | 31.6  | 1.2   | 6.3     |
| Khk       | 4.9   | 2.9   | 6.2     |
| Aldoc     | 10.6  | 2.4   | 5.9     |
| Dtx4      | 7.4   | 2.5   | 5.7     |
| Maged1    | 14.7  | 2.1   | 5.3     |
| App       | 9.6   | 2.4   | 5.1     |
| Lrrc49    | 11.1  | 2.8   | 4.8     |
| Wdfy3     | 3.3   | 1.4   | 4.6     |
| Trib3     | 9.3   | 0.9   | 4.5     |
| Ptpn14    | 6.7   | 2.8   | 4.2     |
| Bhlhe40   | 3.2   | 0.8   | 3.7     |
| Mt1       | 4.7   | 4.3   | 3.7     |
| Dst       | 4.3   | 2.6   | 3.7     |

Up in *Ikzf1*<sup>ΔF4/ΔF4</sup> Thy and Notch

| Gene Name     | Thy   | Notch | BCR-ABL |
|---------------|-------|-------|---------|
| Lmcd1         | 933.0 | 186.0 | 1.4     |
| Gm266         | 172.6 | 107.7 | 1.0     |
| 2310030G06Rik | 40.0  | 76.1  | 43.9    |
| Pdgfa         | 47.8  | 74.1  | 0.8     |
| Ttyh2         | 11.9  | 54.5  | 2.2     |
| Fzd6          | 41.3  | 53.6  | 0.0     |
| 5730528L13Rik | 8.0   | 46.1  | 40.2    |
| Krt18         | 27.6  | 43.0  | 3.7     |
| Ica1          | 19.2  | 38.5  | 2.3     |
| Clec11a       | 9.3   | 38.1  | 1.4     |
| Gm4371        | 41.5  | 36.7  | 1.1     |
| Stc1          | 25.3  | 35.2  | 81.6    |
| Trf           | 5.7   | 32.1  | 2.1     |
| Fam163b       | 6.7   | 31.2  | 4.3     |
| Psmas8        | 26.6  | 29.9  | 92.2    |
| Wscd1         | 37.8  | 27.7  | 47.9    |
| Aif1l         | 23.6  | 25.0  | 0.8     |
| Kctd12        | 3.7   | 24.7  | 2.3     |
| Rhobtb3       | 15.8  | 24.2  | 11.8    |
| B3gnt6        | 26.8  | 22.8  | 2.1     |
| Tgfb2         | 116.3 | 20.2  | 15.7    |
| Rbfox2        | 44.6  | 19.1  | 3.3     |
| Dcbld1        | 69.7  | 18.8  | 2.8     |
| Obsl1         | 60.3  | 18.1  | 1.4     |
| Scn4b         | 3.7   | 17.8  | 0.1     |
| Tceal8        | 9.2   | 17.4  | 3.1     |
| Acvr1         | 5.6   | 16.6  | 1.1     |
| Lima1         | 37.3  | 16.2  | 2.1     |
| Npnt          | 23.9  | 16.0  | 0.9     |
| Podnl1        | 6.2   | 15.8  | 0.8     |
| Fam110b       | 15.3  | 15.2  | 1.1     |
| Gpr83         | 40.3  | 14.7  | 1.1     |
| Syt14         | 14.8  | 14.1  | 2.4     |
| Alcam         | 8.3   | 13.3  | 1.6     |
| Hfe           | 4.0   | 12.2  | 2.6     |
| Pdgfrb        | 4.5   | 12.0  | 2.3     |
| Laptm4b       | 6.0   | 11.8  | 9.8     |
| Scamp5        | 27.3  | 11.3  | 1.0     |
| F2            | 141.7 | 10.8  | 1.1     |
| Rab34         | 46.1  | 10.6  | 1.2     |
| Cyip1         | 8.0   | 10.4  | 1.2     |
| Kif13a        | 4.8   | 10.4  | 1.5     |
| Jub           | 18.9  | 10.0  | 21.4    |
| Abcg2         | 13.4  | 9.9   | 1.3     |
| Lrp1          | 38.8  | 9.9   | 0.9     |
| Cyp4f16       | 5.1   | 9.8   | 2.3     |
| Eng           | 3.3   | 9.8   | 0.9     |
| Rassf8        | 19.8  | 9.8   | 2.4     |
| Car2          | 16.6  | 9.7   | 1.7     |
| Pcgf2         | 6.0   | 9.6   | 2.3     |
| Asph          | 14.2  | 9.5   | 3.1     |
| Gja1          | 3.1   | 9.2   | 0.3     |
| Pon3          | 10.1  | 9.1   | 1.4     |
| Igll1         | 206.6 | 8.9   | 1.5     |
| Ppfilbp1      | 3.1   | 8.9   | 3.1     |
| Adam19        | 77.6  | 8.8   | 5.0     |
| Spry2         | 6.2   | 8.8   | 0.9     |
| Rgl1          | 4.8   | 8.8   | 2.2     |
| Scn2b         | 5.4   | 8.7   | 0.5     |
| Aldh1l1       | 19.2  | 8.7   | 14.5    |
| Arhgef5       | 5.1   | 8.7   | 2.5     |
| Fjx1          | 28.8  | 8.7   | 47.2    |
| Abli2         | 6.7   | 8.6   | 0.7     |
| Lphn2         | 19.9  | 8.4   | 1.7     |
| Mrc1          | 36.8  | 8.3   | 2.4     |
| Tgfb3         | 16.0  | 8.3   | 0.7     |
| Vwce          | 5.8   | 7.9   | 1.8     |
| Dock5         | 3.4   | 7.8   | 2.5     |
| Bex1          | 6.0   | 7.5   | 4.9     |
| Rasgef1b      | 9.7   | 7.4   | 0.8     |

Up in *Ikzf1*<sup>ΔF4/ΔF4</sup> Thy and Notch (cont.)

| Gene Name     | Thy  | Notch | BCR-ABL |
|---------------|------|-------|---------|
| Tbc1d4        | 5.0  | 7.1   | 2.0     |
| Matn2         | 4.7  | 7.1   | 5.7     |
| Cd200         | 4.2  | 6.9   | 1.3     |
| Myo1e         | 64.2 | 6.7   | 1.4     |
| Epas1         | 21.0 | 6.6   | 3.5     |
| Eya2          | 3.7  | 6.6   | 1.0     |
| Tifa          | 7.0  | 6.5   | 0.3     |
| Pkn3          | 8.4  | 6.4   | 3.8     |
| Mmp14         | 66.7 | 6.4   | 2.1     |
| Cyp2j6        | 13.3 | 6.2   | 2.2     |
| H1f0          | 4.5  | 6.1   | 3.3     |
| Ptgfrn        | 43.1 | 6.0   | 3.5     |
| Pmaip1        | 9.1  | 5.9   | 1.1     |
| Cd9           | 8.0  | 5.8   | 1.8     |
| Tns3          | 5.4  | 5.8   | 1.0     |
| Ell2          | 6.5  | 5.6   | 2.0     |
| Wls           | 3.1  | 5.6   | 1.4     |
| Ppp1r1b       | 10.3 | 5.6   | 0.9     |
| Cpsf4l        | 20.1 | 5.6   | 2.1     |
| Ptpkr         | 32.1 | 5.4   | 0.6     |
| Ccdc88a       | 6.2  | 5.4   | 2.1     |
| Scd1          | 11.0 | 5.4   | 1.4     |
| Jun           | 7.0  | 5.3   | 1.8     |
| Sertad4       | 39.4 | 5.3   | 0.4     |
| Als2cl        | 5.3  | 5.2   | 0.5     |
| Scamp1        | 3.0  | 5.1   | 1.9     |
| Slc39a8       | 3.5  | 5.0   | 2.5     |
| Sfrp2         | 24.8 | 5.0   | 6.6     |
| 2510009E07Rik | 5.3  | 4.6   | 1.6     |
| Mpzl2         | 17.5 | 4.3   | 0.1     |
| Dock6         | 6.2  | 4.3   | 4.1     |
| Vash1         | 4.4  | 4.2   | 0.7     |
| Myo10         | 3.6  | 4.2   | 1.9     |
| Tjp2          | 5.5  | 4.1   | 1.6     |
| Oas3          | 6.9  | 4.0   | 1.6     |
| Cadm4         | 15.6 | 3.9   | 1.2     |
| Cdc42ep4      | 3.9  | 3.9   | 2.4     |
| Spsb4         | 9.3  | 3.8   | 3.2     |
| B4gal4        | 3.4  | 3.8   | 1.3     |
| Cdon          | 3.2  | 3.8   | 1.1     |
| Efr3b         | 4.0  | 3.7   | 0.7     |
| Sorbs1        | 3.3  | 3.6   | 1.2     |
| Sifn9         | 5.4  | 3.5   | 2.5     |
| Cdr2l         | 6.8  | 3.5   | 6.2     |
| Pcdhgc3       | 5.9  | 3.3   | 2.7     |
| Cacng4        | 16.0 | 3.2   | 1.1     |
| Capn5         | 3.6  | 3.2   | 0.8     |
| Igf2r         | 18.4 | 3.2   | 0.5     |
| Ctnna1        | 3.0  | 3.2   | 2.4     |
| Kbtbd11       | 3.5  | 3.2   | 0.5     |
| Apoe          | 13.2 | 3.2   | 0.6     |
| Slc5a9        | 10.7 | 3.1   | 4.1     |
| Pcdhgb6       | 5.1  | 3.0   | 2.5     |
| Pcdhgb2       | 5.3  | 3.0   | 2.6     |
| Pcdhgb7       | 5.1  | 3.0   | 2.6     |
| Pcdhga10      | 5.1  | 3.0   | 2.6     |

Up in *Ikzf1*<sup>ΔF4/ΔF4</sup> Notch and BCR-ABL

| Gene Name     | Thy  | Notch | BCR-ABL |
|---------------|------|-------|---------|
| 2810025M15Rik | 11.0 | 9.0   | 7.6     |
| Kit           | 3.3  | 6.9   | 534.8   |
| Igf1r         | 2.9  | 5.4   | 18.6    |
| Apbb2         | 3.9  | 4.2   | 4.9     |
| Gpr125        | 2.4  | 4.2   | 34.0    |
| Fzd7          | 3.2  | 4.1   | 5.1     |
| Emp1          | 3.0  | 3.9   | 9.4     |
| Bmpr2         | 2.6  | 3.4   | 4.3     |
| Coro2b        | 7.0  | 3.1   | 12.9    |

Up in *Ikzf1*<sup>ΔF4/ΔF4</sup> Thy only

| Gene Name     | Thy   | Notch | BCR-ABL |
|---------------|-------|-------|---------|
| Evc           | 442.9 | 47.7  | 47.5    |
| Cdh5          | 407.0 | 3.2   | 37.3    |
| Evc2          | 282.9 | 24.9  | 17.2    |
| Selp          | 274.6 | 1.8   | 20.2    |
| Ccr9          | 222.3 | 0.4   | 3.1     |
| Glt1d1        | 210.8 | 37.1  | 290.9   |
| Tie1          | 171.7 | 5.5   | 5.5     |
| Cd163l1       | 165.2 | 3.9   | 1.1     |
| Crabp2        | 116.7 | 9.5   | 1.0     |
| LOC100503816  | 112.5 | 1.6   | 2.1     |
| Vldlr         | 107.7 | 0.7   | 35.5    |
| Kirrel        | 69.4  | 2.8   | 0.8     |
| St8sia6       | 67.9  | 1.6   | 3.0     |
| Atp6v0d2      | 67.6  | 4.8   | 1.8     |
| Tdrd5         | 59.8  | 1.9   | 1.1     |
| Slc40a1       | 57.7  | 2.9   | 1.5     |
| Acox2         | 55.4  | 6.4   | 1.1     |
| Pcsk1         | 55.3  | 3.2   | 1.6     |
| Ccl4          | 55.2  | 0.8   | 1.4     |
| Procr         | 51.8  | 1.0   | 1.1     |
| Kdr           | 51.5  | 1.2   | 8.1     |
| Pde2a         | 49.6  | 4.2   | 1.0     |
| Specc1        | 48.4  | 3.9   | 0.8     |
| Tmem163       | 47.7  | 3.2   | 5.2     |
| Scarf1        | 44.1  | 1.0   | 9.6     |
| Fgd5          | 43.5  | 4.6   | 14.8    |
| Ccl3          | 43.0  | 1.9   | 1.7     |
| Peli2         | 40.5  | 2.1   | 8.0     |
| Mpl           | 39.3  | 1.8   | 1.1     |
| Tnfrsf8       | 37.4  | 1.9   | 40.0    |
| Mmp13         | 36.9  | 2.7   | 3.0     |
| Myct1         | 35.0  | 1.1   | 4.2     |
| Ifi44         | 34.8  | 2.0   | 6.3     |
| Tcfec         | 30.1  | 1.1   | 1.9     |
| Stfa211       | 28.7  | 1.1   | 8.4     |
| Cc2d2a        | 28.5  | 20.2  | 20.0    |
| Plscr2        | 28.4  | 1.5   | 0.8     |
| Cd3e          | 27.6  | 2.1   | 1.1     |
| Dhrs3         | 27.1  | 0.5   | 1.2     |
| Gcom1         | 26.7  | 2.7   | 69.0    |
| Cd3d          | 26.5  | 1.7   | 0.8     |
| Tmem215       | 26.2  | 1.1   | 1.1     |
| Efhd1         | 25.6  | 4.2   | 1.0     |
| Homer2        | 25.4  | 2.2   | 3.1     |
| Gm14047       | 25.3  | 0.9   | 2.1     |
| 39327         | 24.9  | 2.8   | 3.9     |
| Ltf           | 24.1  | 0.8   | 14.8    |
| B230312C02Rik | 23.8  | 1.1   | 0.5     |
| Hspa1b        | 23.1  | 0.7   | 1.4     |
| Ilgp1         | 23.0  | 7.5   | 1.9     |
| Tnfaip2       | 22.4  | 14.1  | 1.1     |
| Il6ra         | 22.3  | 1.3   | 2.1     |
| Il2rb         | 22.1  | 1.7   | 18.1    |
| Mllt4         | 21.4  | 2.7   | 0.6     |
| Spo11         | 21.2  | 1.9   | 0.6     |
| Gzmc          | 20.9  | 1.5   | 333.2   |
| Gm5483        | 20.8  | 1.2   | 18.8    |
| Bcl3          | 20.5  | 0.5   | 0.5     |
| Tmem204       | 20.3  | 8.3   | 2.6     |
| Arhgap29      | 18.7  | 2.6   | 8.8     |
| Gm11346       | 18.1  | 2.8   | 0.9     |
| Saa3          | 17.5  | 2.1   | 8.4     |
| Olfr644       | 17.4  | 0.9   | 1.1     |
| Liph          | 17.4  | 10.5  | 1.7     |
| Cd3g          | 17.4  | 1.6   | 1.1     |
| Fut10         | 16.9  | 2.1   | 3.5     |
| Ddx60         | 16.6  | 1.6   | 0.6     |
| Gm19434       | 16.5  | 1.6   | 1.1     |
| Ube2l6        | 16.2  | 3.1   | 2.0     |
| Khdrbs3       | 15.8  | 4.8   | 4.1     |

Up in *Ikzf1*<sup>ΔF4/ΔF4</sup> Thy only (cont.)

| Gene Name     | Thy  | Notch | BCR-ABL |
|---------------|------|-------|---------|
| Oasl2         | 15.8 | 3.8   | 1.6     |
| Fcer1a        | 15.6 | 1.1   | 3.2     |
| Sash1         | 15.4 | 1.7   | 2.8     |
| Fhdc1         | 15.3 | 1.0   | 0.9     |
| LOC100499420  | 15.2 | 0.9   | 0.4     |
| Oas2          | 15.1 | 2.5   | 0.6     |
| Mcpt4         | 15.0 | 1.4   | 7.5     |
| Sorbs3        | 14.8 | 1.1   | 0.8     |
| Ehd3          | 14.7 | 1.2   | 1.6     |
| Myo6          | 14.5 | 0.6   | 1.3     |
| Tshz2         | 14.3 | 2.1   | 110.8   |
| Sytl4         | 14.1 | 0.5   | 0.1     |
| P2rx3         | 13.8 | 2.6   | 1.1     |
| Gnb4          | 13.6 | 2.8   | 2.1     |
| Gp49a         | 13.6 | 2.5   | 1.2     |
| Atf5          | 13.5 | 1.2   | 2.7     |
| Plac8         | 13.3 | 1.3   | 1.4     |
| Slfn1         | 12.8 | 1.6   | 0.3     |
| Adamdec1      | 12.8 | 1.1   | 3.3     |
| Ilgae         | 12.6 | 0.3   | 0.9     |
| H2-Q9         | 12.4 | 1.7   | 1.8     |
| H2-Q7         | 12.4 | 1.7   | 1.8     |
| Cox6a2        | 12.3 | 0.1   | 5.8     |
| Nqo1          | 12.2 | 3.7   | 0.8     |
| H2-Q6         | 11.9 | 2.3   | 0.7     |
| Hpgds         | 11.9 | 2.2   | 0.8     |
| Plekhg4       | 11.7 | 3.1   | 8.8     |
| Cdh23         | 11.7 | 0.6   | 1.1     |
| Clstn3        | 11.5 | 7.4   | 2.7     |
| Pdcd1lg2      | 11.5 | 2.7   | 1.1     |
| Atf3          | 11.5 | 1.3   | 1.8     |
| Heat7b1       | 11.4 | 1.4   | 1.9     |
| Serpinf1      | 11.4 | 3.4   | 2.2     |
| Trim6         | 11.3 | 5.3   | 101.6   |
| C77080        | 11.2 | 4.6   | 7.2     |
| 39332         | 10.6 | 1.5   | 3.1     |
| Podxl         | 10.5 | 6.0   | 27.1    |
| Zfp948        | 10.3 | 6.4   | 2.9     |
| Prg3          | 10.2 | 1.4   | 2.8     |
| Rab6b         | 10.2 | 2.2   | 0.9     |
| Abca4         | 10.1 | 2.7   | 4.2     |
| Abca1         | 9.9  | 3.0   | 1.8     |
| Cd300a        | 9.9  | 2.1   | 1.5     |
| Hsd3b7        | 9.6  | 1.8   | 1.6     |
| Mctp1         | 9.5  | 4.8   | 0.8     |
| Tslp          | 9.4  | 5.2   | 3.7     |
| Cd200r4       | 9.2  | 1.6   | 2.0     |
| Pck2          | 9.2  | 1.7   | 1.4     |
| S100a1        | 9.2  | 1.7   | 1.2     |
| Il1b          | 9.2  | 6.0   | 11.1    |
| Acan          | 9.0  | 2.9   | 1.1     |
| Tulp3         | 8.9  | 2.7   | 1.2     |
| Esam          | 8.9  | 1.8   | 8.9     |
| Epb4.111      | 8.8  | 1.0   | 1.0     |
| Dlg3          | 8.7  | 1.7   | 2.5     |
| Sema3f        | 8.7  | 1.7   | 2.2     |
| Olfr643       | 8.6  | 1.1   | 1.1     |
| Flt1          | 8.6  | 2.0   | 154.6   |
| Cd4           | 8.3  | 1.3   | 0.2     |
| Pde5a         | 8.1  | 2.3   | 0.9     |
| Slfn5         | 8.0  | 4.8   | 0.2     |
| Phlda1        | 8.0  | 3.0   | 2.5     |
| Slc22a23      | 7.9  | 2.1   | 2.1     |
| Iffit1        | 7.9  | 2.0   | 0.6     |
| Mylk3         | 7.9  | 1.6   | 3.1     |
| Gimap4        | 7.8  | 1.1   | 2.1     |
| Tnip3         | 7.8  | 0.7   | 1.6     |
| Gm1337        | 7.7  | 15.0  | 2.6     |
| Z610035D17Rik | 7.7  | 2.8   | 2.0     |
| Adora3        | 7.7  | 2.2   | 1.4     |

Up in *Ikzf1*<sup>ΔF4/ΔF4</sup> Thy only (cont.)

| Gene Name     | Thy | Notch | BCR-ABL |
|---------------|-----|-------|---------|
| Dapk1         | 7.7 | 2.4   | 1.0     |
| Sox6          | 7.6 | 1.9   | 0.0     |
| Igfb3         | 7.5 | 2.0   | 3.8     |
| Scn5a         | 7.5 | 0.8   | 4.7     |
| Irf4          | 7.5 | 2.2   | 0.9     |
| Prnp          | 7.4 | 0.9   | 2.1     |
| Fgfr1         | 7.4 | 0.8   | 1.7     |
| Plk2          | 7.4 | 2.4   | 1.4     |
| Hpgd          | 7.2 | 1.1   | 0.8     |
| Ly6a          | 7.2 | 0.7   | 1.4     |
| Gm4956        | 7.2 | 3.2   | 1.1     |
| Otud1         | 7.1 | 1.5   | 1.2     |
| Itgb3         | 7.0 | 2.5   | 2.1     |
| Rassf4        | 7.0 | 5.6   | 1.9     |
| Rnf43         | 7.0 | 0.9   | 2.1     |
| Col4a2        | 7.0 | 1.8   | 0.7     |
| Lag3          | 7.0 | 1.8   | 11.5    |
| Neat1         | 6.9 | 1.9   | 1.1     |
| F13a1         | 6.9 | 1.7   | 5.6     |
| Nynrin        | 6.9 | 9.5   | 1.3     |
| E130102H24Rik | 6.8 | 1.8   | 1.6     |
| Il7r          | 6.8 | 0.9   | 1.0     |
| Syt13         | 6.8 | 1.7   | 0.8     |
| Syde1         | 6.8 | 2.2   | 1.9     |
| Dab2ip        | 6.8 | 2.6   | 1.4     |
| Ilgag9        | 6.7 | 2.0   | 1.0     |
| Bmf           | 6.7 | 1.1   | 0.8     |
| Ldhd          | 6.6 | 4.3   | 1.8     |
| Dennd2d       | 6.6 | 0.7   | 0.9     |
| Wbscr27       | 6.6 | 3.0   | 3.1     |
| Tgfb1         | 6.5 | 3.3   | 1.3     |
| Sall2         | 6.5 | 1.7   | 3.0     |
| Ppt2          | 6.4 | 1.2   | 1.0     |
| Bcl6          | 6.4 | 1.8   | 1.1     |
| Zfp760        | 6.3 | 3.9   | 1.6     |
| Lilrb4        | 6.3 | 1.2   | 1.0     |
| Dtx1          | 6.3 | 1.2   | 0.7     |
| Tmem71        | 6.2 | 1.3   | 0.5     |
| Srgap3        | 6.2 | 2.0   | 2.7     |
| Arsi          | 6.2 | 2.0   | 4.3     |
| Bbc3          | 6.2 | 0.6   | 0.7     |
| Gbp9          | 6.1 | 0.8   | 0.4     |
| H2-Gs10       | 6.1 | 1.4   | 1.0     |
| Lyz2          | 6.1 | 1.0   | 0.9     |
| Lypd6b        | 6.1 | 1.6   | 1.1     |
| Trim16        | 6.0 | 1.2   | 2.5     |
| Gm14446       | 6.0 | 1.0   | 0.5     |
| Cabp1         | 6.0 | 2.7   | 6.4     |
| Ddit3         | 6.0 | 0.7   | 1.4     |
| Clec1b        | 5.9 | 1.5   | 3.3     |
| Cd74          | 5.9 | 3.9   | 0.4     |
| Gadd45g       | 5.9 | 3.1   | 1.9     |
| 8430423G03Rik | 5.9 | 2.7   | 8.5     |
| Ubqln3        | 5.9 | 1.8   | 1.1     |
| Cpa3          | 5.8 | 1.1   | 27.2    |
| Pdk2          | 5.8 | 1.0   | 0.9     |
| Il1rl1        | 5.7 | 1.3   | 6.0     |
| Trp53inp1     | 5.7 | 1.0   | 0.5     |
| Mdga1         | 5.7 | 1.0   | 0.6     |
| Cmtm3         | 5.7 | 2.6   | 2.2     |
| Ifi27l2a      | 5.7 | 0.7   | 1.4     |
| Pkd2l1        | 5.6 | 1.6   | 1.1     |
| Slc25a27      | 5.6 | 1.7   | 4.7     |
| Lfng          | 5.6 | 1.1   | 1.0     |
| Cdkn1a        | 5.6 | 0.7   | 0.4     |
| Dennd5b       | 5.5 | 4.1   | 1.6     |
| Ikzf3         | 5.5 | 1.3   | 0.9     |
| AA388235      | 5.5 | 1.3   | 1.6     |
| Ypel3         | 5.4 | 1.6   | 1.1     |
| Cd81          | 5.4 | 1.6   | 0.9     |

Up in *Ikzf1*<sup>ΔF4/ΔF4</sup> Thy only (cont.)

| Gene Name     | Thy | Notch | BCR-ABL |
|---------------|-----|-------|---------|
| Tnfaip3       | 5.4 | 1.2   | 0.7     |
| Phyh1         | 5.4 | 0.8   | 0.8     |
| Pcdhgc4       | 5.4 | 2.9   | 2.6     |
| Eps8          | 5.3 | 10.7  | 0.5     |
| Gimap6        | 5.3 | 1.1   | 1.5     |
| Fnbp1l        | 5.3 | 2.2   | 0.5     |
| Rgs1          | 5.2 | 2.9   | 1.2     |
| Asah2         | 5.2 | 1.9   | 1.3     |
| Ppp1r16b      | 5.2 | 1.1   | 1.5     |
| Tsc22d1       | 5.1 | 2.2   | 4.4     |
| Ypel1         | 5.1 | 1.7   | 2.3     |
| Rab4a         | 5.1 | 3.9   | 2.0     |
| Angptl6       | 5.1 | 0.9   | 2.2     |
| Cyp4f13       | 5.0 | 1.4   | 0.9     |
| Pcdhga12      | 5.0 | 3.0   | 2.6     |
| Letm2         | 5.0 | 1.2   | 1.2     |
| Trib1         | 5.0 | 1.8   | 2.1     |
| Kcne3         | 5.0 | 1.1   | 1.0     |
| 2310028H24Rik | 5.0 | 1.2   | 2.1     |
| 5830416P10Rik | 4.9 | 1.2   | 0.9     |
| Usp18         | 4.9 | 1.8   | 0.7     |
| C230035116Rik | 4.9 | 4.7   | 1.3     |
| Tjp1          | 4.9 | 1.2   | 20.8    |
| Maff          | 4.9 | 1.2   | 1.4     |
| Ptgs2         | 4.9 | 1.6   | 0.6     |
| Ypel2         | 4.9 | 1.8   | 0.4     |
| Ctse          | 4.9 | 1.2   | 0.5     |
| Trim30d       | 4.9 | 1.4   | 1.0     |
| Tspan31       | 4.8 | 1.5   | 1.1     |
| 2210020M01Rik | 4.8 | 0.4   | 12.1    |
| Stx3          | 4.8 | 2.2   | 2.3     |
| Cd97          | 4.8 | 1.3   | 0.7     |
| Gdpc1         | 4.8 | 1.0   | 1.1     |
| Il15          | 4.8 | 1.8   | 0.9     |
| Klf11         | 4.8 | 1.2   | 1.6     |
| Parvb         | 4.7 | 0.7   | 0.9     |
| P2rx7         | 4.7 | 1.1   | 2.6     |
| Niacr1        | 4.7 | 1.1   | 2.1     |
| Zfp945        | 4.7 | 3.1   | 1.4     |
| Rsad2         | 4.7 | 1.1   | 1.4     |
| Lrig1         | 4.7 | 2.6   | 1.2     |
| Wnt5b         | 4.7 | 2.4   | 3.4     |
| Samd14        | 4.7 | 2.5   | 1.0     |
| Soat2         | 4.7 | 1.3   | 4.4     |
| Egr1          | 4.7 | 3.3   | 1.9     |
| Syng1         | 4.6 | 0.3   | 1.9     |
| Gzma          | 4.6 | 2.5   | 71.0    |
| Ift81         | 4.5 | 1.5   | 7.2     |
| Klhl24        | 4.5 | 1.8   | 1.5     |
| 0610039K10Rik | 4.5 | 1.0   | 1.0     |
| Csf2rb2       | 4.4 | 1.1   | 0.6     |
| Megf8         | 4.4 | 4.9   | 2.2     |
| Iffit2        | 4.4 | 1.1   | 1.3     |
| A930003A15Rik | 4.4 | 2.1   | 1.1     |
| Zcwpw1        | 4.3 | 0.7   | 1.4     |
| Cd274         | 4.3 | 1.1   | 1.2     |
| Ccdc153       | 4.3 | 1.6   | 1.1     |
| Hist2h2be     | 4.3 | 1.1   | 1.3     |
| Sipa1l2       | 4.3 | 1.5   | 1.0     |
| Camk2a        | 4.3 | 0.6   | 1.0     |
| Col4a1        | 4.2 | 2.2   | 0.8     |
| Il9r          | 4.2 | 1.8   | 42.8    |
| Rtp4          | 4.2 | 1.9   | 0.6     |
| Pde4b         | 4.2 | 1.7   | 1.1     |
| Erp27         | 4.2 | 0.8   | 0.9     |
| Zfp365        | 4.2 | 3.1   | 2.1     |
| Gpr128        | 4.2 | 1.4   | 0.3     |
| Art4          | 4.2 | 0.9   | 0.4     |
| Scel          | 4.2 | 2.6   | 0.1     |
| A930001N09Rik | 4.2 | 1.7   | 0.9     |

Up in *Ikzf1*<sup>ΔF4/ΔF4</sup> Thy only (cont.)

| Gene Name     | Thy | Notch | BCR-ABL |
|---------------|-----|-------|---------|
| Ephb6         | 4.2 | 1.4   | 2.6     |
| Cd28          | 4.2 | 1.5   | 1.3     |
| Ier3          | 4.2 | 2.0   | 1.9     |
| Gm11428       | 4.2 | 1.1   | 1.9     |
| Ldlrad3       | 4.2 | 2.8   | 2.2     |
| Hs6st2        | 4.1 | 2.4   | 0.5     |
| Grn           | 4.1 | 2.9   | 1.0     |
| Usp54         | 4.1 | 3.1   | 1.8     |
| Zfp36         | 4.1 | 1.2   | 0.9     |
| Aqp11         | 4.1 | 0.8   | 1.7     |
| Ptger2        | 4.1 | 0.9   | 0.6     |
| Tsc22d3       | 4.1 | 2.8   | 1.9     |
| Xaf1          | 4.1 | 1.5   | 0.7     |
| Arhgap31      | 4.1 | 1.9   | 1.7     |
| Optn          | 4.0 | 3.4   | 0.5     |
| Rab38         | 4.0 | 1.7   | 1.7     |
| Dusp1         | 4.0 | 2.8   | 1.0     |
| Med12l        | 4.0 | 2.8   | 0.6     |
| Hist3h2a      | 4.0 | 1.0   | 1.0     |
| H2-Ab1        | 4.0 | 3.0   | 1.1     |
| Nrp1          | 4.0 | 0.9   | 1.4     |
| Ttpa          | 4.0 | 2.1   | 0.9     |
| Cldn4         | 4.0 | 2.4   | 2.2     |
| Ier5          | 4.0 | 1.4   | 1.3     |
| Nckap1        | 4.0 | 2.0   | 1.2     |
| 9430020K01Rik | 3.9 | 2.6   | 2.6     |
| Klk8          | 3.9 | 1.2   | 13.0    |
| Acad10        | 3.9 | 1.5   | 1.4     |
| 1110051M20Rik | 3.9 | 1.2   | 1.6     |
| Fosb          | 3.9 | 3.0   | 1.5     |
| Adck3         | 3.9 | 3.5   | 1.3     |
| Tecpr1        | 3.9 | 1.8   | 1.1     |
| Gabbr1        | 3.9 | 1.4   | 1.3     |
| Socs3         | 3.9 | 1.2   | 0.8     |
| Dtx3          | 3.9 | 1.1   | 1.2     |
| 1110028C15Rik | 3.9 | 1.4   | 1.6     |
| Nlrc5         | 3.9 | 2.4   | 0.6     |
| Tmem140       | 3.9 | 1.3   | 1.0     |
| Rgs10         | 3.8 | 1.6   | 0.9     |
| Gpc1          | 3.8 | 2.7   | 0.9     |
| H2-K1         | 3.8 | 1.6   | 0.9     |
| Samd9l        | 3.8 | 0.8   | 1.0     |
| Klf6          | 3.8 | 1.3   | 0.9     |
| Cd53          | 3.8 | 3.0   | 1.6     |
| Zhx2          | 3.8 | 2.2   | 1.4     |
| Vopp1         | 3.8 | 1.6   | 1.3     |
| Rad9b         | 3.8 | 1.3   | 1.3     |
| F2r           | 3.8 | 1.9   | 1.6     |
| Selm          | 3.7 | 0.7   | 2.1     |
| St6galnac3    | 3.7 | 10.9  | 2.2     |
| Gm14085       | 3.7 | 1.2   | 2.4     |
| Il17re        | 3.7 | 1.1   | 16.0    |
| Otos          | 3.7 | 3.0   | 1.0     |
| AW011738      | 3.7 | 1.5   | 5.8     |
| Abhd4         | 3.7 | 1.7   | 1.6     |
| Slfm8         | 3.7 | 1.0   | 1.0     |
| Thsd1         | 3.7 | 1.9   | 0.7     |
| Gbp2          | 3.7 | 1.7   | 0.4     |
| Arl4c         | 3.7 | 1.3   | 2.5     |
| Nphp1         | 3.7 | 1.2   | 2.9     |
| Gng2          | 3.7 | 1.5   | 0.9     |
| Gimap9        | 3.6 | 1.1   | 0.8     |
| Calcoco1      | 3.6 | 0.9   | 1.4     |
| H2-T10        | 3.6 | 0.4   | 0.8     |
| Arhgef40      | 3.6 | 1.0   | 3.5     |
| Meis1         | 3.6 | 2.2   | 2.0     |
| Rgs2          | 3.6 | 1.9   | 1.0     |
| Nfkbiz        | 3.6 | 1.4   | 1.2     |
| Pik3ip1       | 3.6 | 1.8   | 0.9     |
| 2610307P16Rik | 3.6 | 1.5   | 2.0     |

Up in *Ikzf1*<sup>ΔF4/ΔF4</sup> Thy only (cont.)

| Gene Name     | Thy | Notch | BCR-ABL |
|---------------|-----|-------|---------|
| Adcy6         | 3.5 | 1.1   | 1.3     |
| Slc2a9        | 3.5 | 2.7   | 1.1     |
| Hjurp         | 3.5 | 1.3   | 1.4     |
| Pip5k1b       | 3.5 | 1.9   | 0.8     |
| 6430706D22Rik | 3.5 | 1.3   | 1.5     |
| Nudt4         | 3.4 | 1.3   | 2.6     |
| H2-T24        | 3.4 | 1.1   | 0.5     |
| Foxj2         | 3.4 | 1.4   | 1.7     |
| Oas1b         | 3.4 | 1.3   | 0.8     |
| 4930481A15Rik | 3.4 | 1.7   | 0.8     |
| Fam189b       | 3.4 | 2.2   | 1.1     |
| 4933407H18Rik | 3.4 | 1.3   | 1.3     |
| Tmprss7       | 3.4 | 1.8   | 0.8     |
| Tanc1         | 3.4 | 2.3   | 2.3     |
| Lpar6         | 3.4 | 2.0   | 1.0     |
| Anxa5         | 3.4 | 1.8   | 2.5     |
| Accs          | 3.4 | 1.9   | 1.5     |
| Herc6         | 3.4 | 1.4   | 1.2     |
| Kank3         | 3.4 | 1.7   | 1.6     |
| Rbbp9         | 3.4 | 1.8   | 1.2     |
| Ogdh          | 3.4 | 1.5   | 0.7     |
| Pcyt1b        | 3.4 | 1.0   | 2.8     |
| Wdr19         | 3.3 | 2.2   | 2.1     |
| Glrp1         | 3.3 | 0.9   | 1.0     |
| Ppp1r15a      | 3.3 | 1.3   | 1.3     |
| Pisd-ps1      | 3.3 | 1.4   | 1.3     |
| Pisd-ps3      | 3.3 | 1.4   | 1.3     |
| Gm5918        | 3.3 | 1.0   | 1.7     |
| Cd302         | 3.3 | 1.1   | 2.9     |
| Gpr183        | 3.3 | 3.3   | 1.3     |
| Zdhhc1        | 3.3 | 2.7   | 2.5     |
| A730008H23Rik | 3.3 | 1.3   | 1.4     |
| Pcmt1         | 3.3 | 1.5   | 1.2     |
| Malat1        | 3.3 | 2.0   | 0.8     |
| Gbp8          | 3.3 | 0.6   | 0.7     |
| Ccdc28a       | 3.3 | 1.2   | 1.4     |
| Ctso          | 3.3 | 1.8   | 0.8     |
| Sh3kbp1       | 3.3 | 1.8   | 1.0     |
| Ctxn1         | 3.2 | 1.0   | 1.5     |
| Cntd1         | 3.2 | 1.1   | 3.5     |
| Armcx1        | 3.2 | 0.6   | 2.9     |
| Zfp623        | 3.2 | 1.6   | 2.6     |
| Itga2b        | 3.2 | 1.4   | 3.1     |
| Gm5424        | 3.2 | 1.3   | 1.9     |
| Fam102b       | 3.2 | 1.2   | 1.9     |
| 1500015A07Rik | 3.2 | 1.0   | 1.5     |
| Plk3          | 3.2 | 2.7   | 1.8     |
| Gbp4          | 3.2 | 0.9   | 0.3     |
| Fos           | 3.2 | 2.6   | 0.6     |
| Cln2          | 3.2 | 2.3   | 2.1     |
| Cd33          | 3.2 | 0.2   | 0.9     |
| Fgf3          | 3.2 | 1.5   | 1.1     |
| Eea1          | 3.2 | 2.4   | 0.9     |
| Nwd1          | 3.1 | 0.5   | 14.9    |
| Mcart6        | 3.1 | 1.4   | 0.2     |
| Ptk7          | 3.1 | 2.3   | 1.3     |
| Hist1h2bc     | 3.1 | 1.3   | 0.8     |
| Ablim1        | 3.1 | 1.2   | 1.1     |
| Tmem86a       | 3.1 | 1.2   | 0.5     |
| 6720401G13Rik | 3.1 | 2.2   | 1.0     |
| Plk1s1        | 3.1 | 1.4   | 1.6     |
| Vcl           | 3.1 | 3.0   | 1.8     |
| Vps13d        | 3.1 | 1.7   | 1.0     |
| Rdm1          | 3.1 | 0.9   | 1.4     |
| Thy1          | 3.1 | 1.1   | 9.9     |
| B130034C11Rik | 3.1 | 1.6   | 1.1     |
| Slc18a2       | 3.1 | 2.4   | 13.6    |
| Ikzf2         | 3.1 | 1.9   | 1.5     |
| Arhgap21      | 3.1 | 2.3   | 1.2     |
| Tcea2         | 3.0 | 1.7   | 1.5     |

Up in *Ikzf1*<sup>ΔF4/ΔF4</sup> Thy only (cont.)

| Gene Name | Thy | Notch | BCR-ABL |
|-----------|-----|-------|---------|
| Gimap1    | 3.0 | 1.5   | 1.0     |
| Myliip    | 3.0 | 2.2   | 1.1     |
| Acrbp     | 3.0 | 1.3   | 0.9     |
| Havcr2    | 3.0 | 1.3   | 0.9     |
| Pim2      | 3.0 | 1.0   | 0.6     |

Up in *Ikzf1*<sup>ΔF4/ΔF4</sup> Notch only

| Gene Name     | Thy  | Notch | BCR-ABL |
|---------------|------|-------|---------|
| Ccbe1         | 9.5  | 229.6 | 2.3     |
| Mmp9          | 16.8 | 205.1 | 2.4     |
| Ednrb         | 1.6  | 166.8 | 5.5     |
| Prom1         | 38.1 | 78.9  | 2.6     |
| Tmem27        | 24.4 | 74.4  | 1.1     |
| Odf3l1        | 4.1  | 69.5  | 0.5     |
| Trim2         | 17.1 | 58.8  | 0.8     |
| Lhfp          | 21.8 | 58.1  | 1.7     |
| Ablim3        | 18.1 | 50.0  | 1.0     |
| Serpinb8      | 8.8  | 46.1  | 0.8     |
| Agtr1a        | 1.1  | 42.8  | 2.2     |
| Sec14l2       | 4.3  | 40.8  | 1.6     |
| Vegfc         | 1.1  | 38.7  | 3.1     |
| Pvrl1         | 7.3  | 38.5  | 3.4     |
| Mafb          | 11.5 | 36.3  | 1.6     |
| Hspb2         | 2.1  | 35.5  | 3.1     |
| Z300002M23Rik | 4.5  | 35.3  | 1.1     |
| Prdm5         | 4.7  | 34.5  | 3.5     |
| 1200009I06Rik | 73.1 | 31.5  | 3.3     |
| Susd4         | 38.7 | 29.1  | 1.6     |
| Amotl1        | 4.2  | 28.8  | 1.5     |
| Arnt2         | 13.5 | 28.6  | 2.3     |
| Stra6         | 8.8  | 27.4  | 1.1     |
| Trnp1         | 8.3  | 26.6  | 0.8     |
| Fstl4         | 20.7 | 26.2  | 0.5     |
| Hopx          | 5.4  | 24.4  | 0.5     |
| Rhod          | 3.0  | 24.2  | 1.3     |
| Clip4         | 16.4 | 23.9  | 39.2    |
| Egfr          | 11.7 | 21.8  | 2.3     |
| Lamb1         | 38.4 | 21.3  | 5.6     |
| Lmo2          | 2.7  | 21.0  | 2.2     |
| Tceal1        | 2.3  | 18.5  | 3.3     |
| Fap           | 3.9  | 18.3  | 6.6     |
| Fam101b       | 24.4 | 16.8  | 0.3     |
| Icos          | 2.3  | 16.2  | 0.7     |
| Shank1        | 5.1  | 16.2  | 3.0     |
| Tirap         | 4.3  | 16.0  | 0.9     |
| Chst2         | 7.9  | 16.0  | 2.0     |
| Dixdc1        | 5.0  | 14.9  | 3.0     |
| Pyroxd2       | 8.2  | 14.9  | 1.8     |
| Il22          | 15.1 | 14.8  | 1.1     |
| Gjc1          | 1.7  | 14.4  | 2.5     |
| Pde9a         | 12.4 | 14.2  | 0.0     |
| Cthrc1        | 9.1  | 14.0  | 0.5     |
| Myo1b         | 13.6 | 12.6  | 2.6     |
| Hbegf         | 2.2  | 12.4  | 0.8     |
| Gjb2          | 8.0  | 12.2  | 1.1     |
| Hspb8         | 2.1  | 12.0  | 0.5     |
| Tspan32       | 1.8  | 11.5  | 1.0     |
| Fabp4         | 6.7  | 11.4  | 2.3     |
| Gli1          | 15.4 | 11.2  | 1.1     |
| Sgip1         | 1.6  | 11.0  | 0.7     |
| Chit1         | 1.1  | 10.9  | 1.1     |
| Hey1          | 14.3 | 10.2  | 1.3     |
| Fosl2         | 1.7  | 9.6   | 0.8     |
| Bace1         | 2.4  | 9.3   | 2.3     |
| Cryab         | 3.3  | 9.1   | 0.9     |
| Acvrl1        | 7.4  | 9.0   | 1.4     |
| C030034L19Rik | 2.5  | 9.0   | 1.2     |
| Amica1        | 3.7  | 9.0   | 1.5     |
| Spats2l       | 2.1  | 8.9   | 1.0     |

Up in *Ikzf1*<sup>ΔF4/ΔF4</sup> Notch only (cont.)

| Gene Name     | Thy  | Notch | BCR-ABL |
|---------------|------|-------|---------|
| Olfml3        | 2.7  | 8.8   | 1.3     |
| Cox4i2        | 1.4  | 8.8   | 2.4     |
| Abat          | 3.1  | 8.6   | 1.6     |
| Tmtc2         | 2.2  | 8.5   | 48.3    |
| Rpl39l        | 5.8  | 8.3   | 0.6     |
| Btbd11        | 5.3  | 8.3   | 1.8     |
| 5730416F02Rik | 2.4  | 8.1   | 0.8     |
| Slc35d3       | 1.5  | 8.0   | 3.7     |
| Aldh3b1       | 1.1  | 7.4   | 3.0     |
| Slc9a2        | 3.4  | 7.3   | 11.1    |
| Tspan7        | 6.0  | 7.2   | 1.7     |
| Svep1         | 1.2  | 7.1   | 0.7     |
| Igf2bp2       | 1.6  | 6.4   | 1.1     |
| Cxcl10        | 5.5  | 6.4   | 1.2     |
| Ldlrap1       | 1.6  | 6.4   | 0.9     |
| Trim36        | 2.9  | 6.3   | 1.8     |
| Slc25a13      | 2.0  | 6.3   | 4.1     |
| D630039A03Rik | 6.3  | 6.3   | 0.4     |
| Lgals3        | 10.3 | 6.3   | 1.7     |
| Rras          | 5.1  | 6.3   | 2.4     |
| Sepp1         | 2.5  | 6.2   | 0.7     |
| Dlg1          | 1.2  | 6.1   | 1.0     |
| Bpil2         | 1.4  | 6.1   | 1.0     |
| Il1r12        | 1.2  | 6.0   | 2.5     |
| Frmd4b        | 3.1  | 6.0   | 2.9     |
| Fhl2          | 3.0  | 5.8   | 0.9     |
| Fgd1          | 2.2  | 5.6   | 36.6    |
| Igfbp7        | 10.0 | 5.5   | 0.7     |
| Sh3pxd2a      | 2.1  | 5.4   | 2.0     |
| Ahnak         | 3.1  | 5.4   | 1.7     |
| Capg          | 2.4  | 5.3   | 0.9     |
| Cd160         | 4.9  | 5.3   | 0.3     |
| Esm1          | 1.6  | 5.3   | 3.2     |
| Inpp1         | 22.7 | 5.3   | 1.1     |
| Fam26f        | 1.9  | 5.3   | 1.2     |
| Z310007L24Rik | 8.8  | 5.1   | 1.1     |
| Lpar4         | 4.1  | 5.0   | 6.2     |
| Nrarp         | 1.0  | 5.0   | 0.8     |
| Bmp7          | 11.8 | 5.0   | 2.1     |
| Nfil3         | 1.9  | 4.9   | 2.0     |
| Appl2         | 9.7  | 4.9   | 1.1     |
| Axl           | 2.6  | 4.9   | 2.3     |
| Snrk          | 1.4  | 4.9   | 1.0     |
| Abcb1a        | 9.8  | 4.8   | 2.1     |
| St6gal1       | 2.4  | 4.8   | 3.3     |
| Ppap2a        | 2.3  | 4.8   | 2.4     |
| Tnfrsf11      | 5.4  | 4.7   | 0.9     |
| Ccdc125       | 2.7  | 4.7   | 1.1     |
| Tnfrsf21      | 2.2  | 4.7   | 1.0     |
| Steap3        | 4.9  | 4.6   | 0.8     |
| Dsty          | 2.4  | 4.6   | 1.3     |
| Casp1         | 2.9  | 4.6   | 1.3     |
| Epb4.115      | 4.0  | 4.6   | 1.1     |
| Fggy          | 4.0  | 4.5   | 1.3     |
| Slc9a9        | 2.0  | 4.5   | 0.5     |
| Elk3          | 1.4  | 4.5   | 1.8     |
| Id2           | 1.8  | 4.5   | 1.1     |
| Airn          | 20.1 | 4.4   | 1.3     |
| Ifi204        | 18.6 | 4.3   | 1.1     |
| Atp2b4        | 1.9  | 4.3   | 3.8     |
| Sox13         | 9.4  | 4.3   | 0.6     |
| Tmem2         | 2.4  | 4.2   | 1.3     |
| Rffl          | 2.2  | 4.1   | 0.8     |
| Nrip1         | 1.4  | 4.1   | 1.1     |
| Dock9         | 2.8  | 4.1   | 1.4     |
| Chd7          | 8.1  | 4.1   | 3.1     |
| Tmem55a       | 2.8  | 4.1   | 1.5     |
| Mtap          | 1.9  | 4.0   | 1.2     |
| Msr3          | 2.2  | 4.0   | 0.6     |
| Upb1          | 2.4  | 3.9   | 3.1     |

Up in *Ikzf1*<sup>ΔF4/ΔF4</sup> Notch only (cont.)

| Gene Name     | Thy  | Notch | BCR-ABL |
|---------------|------|-------|---------|
| Dio2          | 2.7  | 3.9   | 0.7     |
| Ptpn13        | 62.8 | 3.8   | 1.6     |
| Cobll1        | 2.6  | 3.7   | 1.2     |
| Sh3bp5        | 2.3  | 3.7   | 0.9     |
| Ntn1          | 2.2  | 3.6   | 9.1     |
| Slc44a1       | 3.5  | 3.6   | 1.9     |
| Arrdc3        | 2.4  | 3.6   | 0.9     |
| Ccr7          | 3.0  | 3.5   | 0.7     |
| Morf4l2       | 1.2  | 3.5   | 1.3     |
| Gkap1         | 3.7  | 3.5   | 2.2     |
| Prmt7         | 1.9  | 3.4   | 1.4     |
| Plcl1         | 5.1  | 3.4   | 7.9     |
| Fam20a        | 21.2 | 3.4   | 1.2     |
| Cntln         | 1.9  | 3.4   | 0.9     |
| Atp8b4        | 3.3  | 3.3   | 2.6     |
| Rel1          | 2.8  | 3.3   | 1.1     |
| Gm2a          | 1.5  | 3.3   | 0.9     |
| Rapgef2       | 1.1  | 3.3   | 1.5     |
| Enc1          | 2.3  | 3.3   | 1.0     |
| Arhgap5       | 2.2  | 3.2   | 3.1     |
| Fbp1          | 1.1  | 3.2   | 1.2     |
| Bin1          | 1.6  | 3.2   | 0.9     |
| Cnksr3        | 1.8  | 3.2   | 2.9     |
| Nhsl1         | 7.3  | 3.1   | 3.7     |
| Fmnl2         | 6.1  | 3.1   | 12.4    |
| 4632428N05Rik | 0.9  | 3.1   | 0.4     |
| Cdh1          | 3.2  | 3.1   | 0.4     |
| Sell          | 1.4  | 3.1   | 0.5     |

Up in *Ikzf1*<sup>ΔF4/ΔF4</sup> BCR-ABL only

| Gene Name | Thy  | Notch | BCR-ABL |
|-----------|------|-------|---------|
| Igf2as    | 4.6  | 2.3   | 2710.9  |
| Kcnma1    | 15.6 | 94.7  | 1757.2  |
| Hoxb8     | 1.2  | 1.1   | 1247.8  |
| Hoxb7     | 2.2  | 0.9   | 999.1   |
| Igf2      | 6.6  | 1.6   | 930.3   |
| Ngp       | 6.6  | 0.5   | 717.5   |
| Prdm8     | 1.9  | 1.1   | 605.2   |
| Lmo1      | 1.1  | 0.8   | 473.7   |
| Chi3l3    | 3.8  | 0.7   | 355.4   |
| S100a9    | 7.6  | 0.7   | 270.8   |
| Afap1l1   | 2.6  | 10.3  | 262.4   |
| Retnl     | 1.1  | 1.1   | 139.7   |
| Efna1     | 17.5 | 4.8   | 128.1   |
| Pkdcc     | 6.3  | 1.0   | 102.0   |
| S100a8    | 5.4  | 0.6   | 93.0    |
| Smpd3     | 13.0 | 1.8   | 60.9    |
| Lhx2      | 5.9  | 1.0   | 58.8    |
| Sh2b2     | 1.4  | 1.6   | 49.5    |
| Mdfi      | 2.3  | 5.4   | 45.3    |
| Nxph4     | 6.8  | 0.8   | 43.5    |
| Celf4     | 3.2  | 2.3   | 41.2    |
| Tbx19     | 6.3  | 1.3   | 31.8    |
| Hs3st2    | 1.3  | 1.1   | 31.8    |
| Prg2      | 19.4 | 0.7   | 31.0    |
| Cyp27a1   | 9.2  | 2.3   | 25.7    |
| Ndr1      | 3.0  | 1.3   | 25.4    |
| Arg1      | 11.5 | 1.3   | 23.5    |
| Mgl2      | 8.8  | 1.4   | 22.7    |
| B3gnt5    | 2.3  | 2.6   | 20.9    |
| Prss12    | 2.2  | 1.1   | 20.5    |
| Tgfbr3    | 1.5  | 0.8   | 20.4    |
| Hip1      | 1.3  | 0.6   | 18.1    |
| Rps4y2    | 2.1  | 2.0   | 17.7    |
| Ifitm1    | 4.4  | 2.0   | 16.8    |
| Galnt3    | 3.7  | 3.8   | 16.1    |
| Klhl23    | 1.8  | 3.7   | 15.2    |
| Olfm1     | 4.0  | 1.1   | 14.5    |
| Col6a6    | 1.1  | 1.1   | 13.5    |



Up in *Ikzf1*<sup>ΔF4/ΔF4</sup> BCR-ABL only (cont.)

| Gene Name     | Thy  | Notch | BCR-ABL |
|---------------|------|-------|---------|
| Epb4.1l3      | 1.9  | 2.7   | 13.2    |
| Fxyd6         | 10.6 | 1.4   | 13.2    |
| Ptk2          | 3.5  | 0.7   | 12.4    |
| Ly86          | 23.1 | 26.3  | 11.7    |
| Cdc42bpa      | 2.9  | 2.1   | 11.5    |
| Angptl2       | 2.0  | 1.8   | 11.3    |
| Sulf2         | 3.4  | 0.7   | 11.1    |
| Fhl1          | 8.8  | 1.4   | 11.0    |
| Grb10         | 4.3  | 3.6   | 10.9    |
| Cask          | 2.7  | 1.1   | 10.8    |
| Luzp1         | 2.8  | 3.0   | 10.8    |
| Tac4          | 4.1  | 1.2   | 10.6    |
| 39334         | 1.0  | 1.2   | 10.5    |
| Lysmd2        | 2.2  | 2.3   | 10.1    |
| Tnni2         | 2.2  | 1.5   | 10.0    |
| Ccl8          | 10.5 | 1.1   | 9.6     |
| Clcf1         | 5.3  | 1.1   | 9.5     |
| S1pr3         | 1.9  | 1.0   | 9.4     |
| Ccdc19        | 3.4  | 1.6   | 9.1     |
| C1qtnf6       | 13.0 | 5.0   | 9.1     |
| Aes           | 0.8  | 0.7   | 8.9     |
| Pard6g        | 1.2  | 1.4   | 8.3     |
| Ccnd1         | 4.9  | 1.3   | 8.3     |
| Depdc7        | 3.9  | 1.6   | 8.2     |
| Ppap2b        | 6.6  | 3.7   | 8.2     |
| Nfix          | 2.3  | 1.5   | 7.7     |
| Dusp4         | 1.5  | 0.9   | 7.7     |
| Epdr1         | 13.8 | 5.5   | 7.7     |
| Fgf13         | 3.5  | 0.4   | 7.6     |
| Fkbp11        | 1.5  | 0.9   | 7.5     |
| Ston1         | 2.4  | 1.3   | 7.5     |
| B230118H07Rik | 2.7  | 1.9   | 7.4     |
| Tom1l1        | 4.3  | 1.4   | 7.4     |
| Chac1         | 2.0  | 1.4   | 7.4     |
| Gpt2          | 3.0  | 1.0   | 7.1     |
| Asb2          | 6.3  | 1.6   | 7.0     |
| Cdc42bpb      | 3.2  | 1.2   | 6.9     |
| Clec2i        | 1.4  | 1.5   | 6.8     |
| Tst           | 1.0  | 2.4   | 6.5     |
| Echdc2        | 5.0  | 3.2   | 6.4     |
| Filip1        | 9.5  | 10.8  | 6.3     |
| Ctsk          | 1.8  | 1.3   | 6.1     |
| Cd248         | 2.5  | 1.0   | 6.1     |
| Iqgap2        | 1.3  | 1.2   | 6.0     |
| Nfia          | 2.6  | 2.3   | 6.0     |
| Plxnb2        | 4.9  | 1.0   | 5.9     |
| Slamf9        | 4.9  | 3.2   | 5.9     |
| Tcf7l1        | 1.1  | 2.0   | 5.9     |
| Tubb3         | 1.5  | 0.4   | 5.8     |
| Emb           | 1.3  | 1.8   | 5.7     |
| Asap2         | 3.4  | 1.8   | 5.6     |
| St3gal5       | 1.8  | 1.7   | 5.6     |
| Syde2         | 1.8  | 1.0   | 5.5     |
| Rpp25         | 1.4  | 0.7   | 5.4     |
| Nupr1         | 3.3  | 2.0   | 5.4     |
| Cst7          | 7.1  | 3.2   | 5.4     |
| Spire1        | 4.7  | 1.4   | 5.4     |
| Spry4         | 1.4  | 2.1   | 5.3     |
| Nsg2          | 1.1  | 0.7   | 5.3     |
| Itga5         | 1.3  | 1.9   | 5.2     |
| Itgax         | 2.1  | 0.9   | 5.2     |
| Smad1         | 1.6  | 1.2   | 5.1     |
| P4ha2         | 2.6  | 0.7   | 5.0     |
| Slc16a3       | 1.5  | 0.3   | 5.0     |
| Stac2         | 5.5  | 1.1   | 4.9     |
| Erf           | 1.0  | 1.1   | 4.9     |
| Fetub         | 1.1  | 1.6   | 4.9     |
| 1700025G04Rik | 1.6  | 1.4   | 4.9     |
| Rag1          | 1.6  | 1.4   | 4.8     |
| Naca          | 1.3  | 1.1   | 4.4     |

Up in *Ikzf1*<sup>ΔF4/ΔF4</sup> BCR-ABL only (cont.)

| Gene Name | Thy  | Notch | BCR-ABL |
|-----------|------|-------|---------|
| Prickle3  | 1.4  | 0.9   | 4.4     |
| Decr2     | 2.5  | 1.4   | 4.4     |
| Atp5k     | 1.1  | 1.1   | 4.4     |
| Rdh10     | 2.9  | 2.1   | 4.3     |
| Ptgir     | 8.8  | 4.7   | 4.3     |
| Gas6      | 1.1  | 1.8   | 4.2     |
| Eya1      | 3.0  | 0.9   | 4.2     |
| Rasa4     | 1.9  | 0.3   | 4.2     |
| St3gal6   | 2.0  | 0.3   | 4.1     |
| Dennd3    | 1.4  | 0.8   | 4.1     |
| Zfp385a   | 1.3  | 1.3   | 4.0     |
| Ncf1      | 3.0  | 2.4   | 4.0     |
| Ccdc90b   | 1.7  | 2.9   | 3.9     |
| Zbtb8os   | 1.4  | 0.9   | 3.9     |
| Clec7a    | 3.3  | 1.8   | 3.8     |
| Fam43a    | 1.4  | 1.1   | 3.7     |
| Gng4      | 10.0 | 16.8  | 3.7     |
| Fes       | 1.2  | 1.6   | 3.6     |
| Sema7a    | 8.3  | 1.9   | 3.6     |
| Uchl1     | 1.1  | 0.8   | 3.6     |
| Asns      | 2.6  | 0.8   | 3.5     |
| Arhgef11  | 1.7  | 1.3   | 3.5     |
| Plxnd1    | 1.5  | 2.1   | 3.5     |

Down in *Ikzf1*<sup>ΔF4/ΔF4</sup> Thy, Notch, and BCR-ABL

| Gene Name     | Thy  | Notch | BCR-ABL |
|---------------|------|-------|---------|
| Ly6d          | 8.4  | 45.8  | 50.5    |
| 2010001M09Rik | 6.3  | 36.9  | 4.7     |
| Napsa         | 11.0 | 25.0  | 3.5     |
| Bst1          | 5.9  | 21.1  | 4.4     |
| Blk           | 21.7 | 11.8  | 19.7    |
| AA467197      | 4.6  | 11.8  | 4.7     |
| Epcam         | 7.1  | 7.8   | 14.3    |
| Lif           | 13.0 | 3.6   | 4.1     |
| Armcx4        | 8.8  | 3.5   | 9.7     |

  > 10-fold down

  3- to 10-fold down

Down in *Ikzf1*<sup>ΔF4/ΔF4</sup> Thy and Notch

| Gene Name     | Thy  | Notch | BCR-ABL |
|---------------|------|-------|---------|
| Il34          | 8.1  | 54.3  | 2.9     |
| Tox3          | 3.4  | 45.8  | 1.0     |
| Erg           | 4.3  | 35.9  | 1.9     |
| 5830411N06Rik | 94.4 | 32.7  | 1.0     |
| Serp1b1a      | 3.4  | 31.0  | 0.7     |
| Rasa4         | 7.5  | 18.6  | 0.3     |
| Ncf4          | 14.2 | 16.7  | 2.1     |
| Cpne2         | 7.7  | 16.4  | 0.9     |
| Card10        | 6.0  | 14.4  | 0.9     |
| 4921525O09Rik | 9.2  | 14.0  | 2.2     |
| Gpr174        | 7.7  | 13.4  | 47.2    |
| Ccdc164       | 22.8 | 12.3  | 7.7     |
| Itgae         | 35.8 | 11.8  | 1.8     |
| Tubb2a-ps2    | 5.2  | 10.6  | 3.9     |
| Grasp         | 3.7  | 9.5   | 1.0     |
| Lsp1          | 12.5 | 9.4   | 0.4     |
| Spib          | 4.5  | 9.3   | 3.0     |
| Tctex1d1      | 26.8 | 8.7   | 1.0     |
| Unc5cl        | 6.4  | 8.0   | 30.5    |
| Nkg7          | 3.9  | 6.6   | 0.4     |
| Tubb3         | 21.6 | 6.2   | 0.7     |
| Itgb7         | 7.1  | 6.1   | 1.0     |
| Trim46        | 5.7  | 6.0   | 1.5     |
| Rtn4r1        | 8.9  | 6.0   | 1.4     |
| Chst10        | 5.7  | 5.9   | 3.1     |
| AW112010      | 3.3  | 5.4   | 2.8     |
| Fbln2         | 3.1  | 5.2   | 3.5     |
| Epsti1        | 4.9  | 5.0   | 3.3     |
| Cdh23         | 10.5 | 4.6   | 2.5     |
| Nsg2          | 3.2  | 4.5   | 0.7     |
| Anxa2         | 8.1  | 4.3   | 1.3     |
| Fgf13         | 3.6  | 4.1   | 0.6     |
| Nefh          | 3.9  | 4.0   | 2.3     |
| Preli2        | 5.6  | 3.9   | 1.4     |
| Clec12a       | 3.9  | 3.9   | 2.3     |
| Lamc1         | 4.7  | 3.7   | 1.0     |
| Igf2bp3       | 8.9  | 3.6   | 0.8     |
| Pld4          | 5.3  | 3.4   | 1.0     |
| 1700048O20Rik | 4.3  | 3.3   | 1.7     |
| Il7r          | 3.5  | 3.3   | 1.2     |

Down in *Ikzf1*<sup>ΔF4/ΔF4</sup> Notch and BCR-ABL

| Gene Name | Thy | Notch | BCR-ABL |
|-----------|-----|-------|---------|
| Gm5111    | 2.7 | 9.0   | 7.5     |
| Arl5c     | 5.2 | 7.0   | 21.3    |
| Lynx1     | 2.0 | 6.8   | 11.2    |
| Cxcr5     | 7.0 | 6.7   | 27.6    |
| Cd2       | 3.5 | 5.8   | 10.1    |

Down in *Ikzf1*<sup>ΔF4/ΔF4</sup> Thy and BCR-ABL

| Gene Name | Thy  | Notch | BCR-ABL |
|-----------|------|-------|---------|
| BC064078  | 8.1  | 5.2   | 749.8   |
| Zbp1      | 3.1  | 2.4   | 36.0    |
| Akr1c12   | 3.5  | 1.4   | 34.2    |
| Tnfrsf26  | 4.6  | 1.4   | 16.9    |
| Acp5      | 5.6  | 2.0   | 10.6    |
| Hsd11b1   | 7.2  | 2.2   | 9.4     |
| Ltb       | 3.0  | 2.4   | 8.7     |
| Tes       | 3.3  | 2.3   | 8.1     |
| Socs1     | 7.5  | 2.2   | 5.9     |
| Rasgrp1   | 6.3  | 1.3   | 5.4     |
| Plod2     | 3.2  | 2.5   | 5.2     |
| Sp100     | 4.9  | 2.5   | 4.9     |
| Lta       | 49.7 | 3.8   | 4.7     |
| Tmem121   | 3.0  | 1.5   | 4.5     |
| Emid1     | 7.3  | 2.6   | 4.1     |

Down in *Ikzf1*<sup>ΔF4/ΔF4</sup> Thy only

| Gene Name | Thy   | Notch | BCR-ABL |
|-----------|-------|-------|---------|
| Hbb-b1    | 170.2 | 3.7   | 1.1     |
| Hbb-b2    | 170.2 | 3.7   | 1.1     |
| Pdcd1     | 79.3  | 2.3   | 0.6     |
| Trib2     | 60.6  | 2.4   | 0.5     |
| Gap1      | 28.5  | 1.7   | 16.4    |
| Cyp11a1   | 25.3  | 1.5   | 0.9     |
| Gpr114    | 23.6  | 1.4   | 0.9     |
| Stk39     | 22.5  | 1.1   | 0.4     |
| Cdh1      | 19.1  | 0.6   | 10.9    |
| Pglyrp1   | 17.5  | 1.5   | 0.9     |
| Ndr2      | 16.8  | 2.4   | 1.0     |
| Il17rb    | 16.3  | 0.8   | 1.8     |
| Ccr4      | 14.7  | 0.7   | 13.9    |
| Lat2      | 13.0  | 3.5   | 2.1     |
| Ccdc102a  | 12.8  | 1.7   | 1.6     |
| Perp      | 12.7  | 0.6   | 11.6    |
| Cldn2     | 12.0  | 2.9   | 1.0     |
| Mfsd2a    | 11.4  | 1.5   | 2.7     |
| Scin      | 10.4  | 4.6   | 2.5     |
| Itgb5     | 10.0  | 1.1   | 2.8     |
| Naaa      | 9.8   | 1.5   | 1.7     |
| Trfr2     | 9.5   | 4.8   | 4.4     |
| Il12rb1   | 9.0   | 1.6   | 11.3    |
| Gpr97     | 8.8   | 2.5   | 2.1     |
| Kmo       | 8.7   | 6.0   | 2.3     |
| Rag2      | 8.6   | 1.0   | 0.5     |
| Chdh      | 7.9   | 1.2   | 1.0     |
| Rpl35     | 7.9   | 1.1   | 1.0     |
| Adamts2   | 7.9   | 5.0   | 0.2     |
| Trpa1     | 7.8   | 4.7   | 0.2     |
| Cdr2      | 7.7   | 1.3   | 1.0     |
| Psg17     | 7.7   | 3.0   | 2.9     |
| Sdc4      | 7.7   | 1.9   | 1.3     |
| Cd59a     | 7.4   | 8.8   | 3.3     |
| Sytl4     | 7.3   | 4.6   | 53.5    |
| Hmga1-rs1 | 7.1   | 2.1   | 1.7     |
| St3gal2   | 7.0   | 2.2   | 1.2     |
| Ms4a4c    | 6.9   | 2.9   | 7.5     |
| Hmga1     | 6.9   | 2.0   | 1.6     |
| Prr5      | 6.9   | 3.4   | 1.0     |
| Gzma      | 6.5   | 1.3   | 0.5     |
| Fam20a    | 6.4   | 1.0   | 1.9     |
| Osm       | 6.2   | 1.8   | 1.1     |
| Sorl1     | 6.1   | 4.7   | 2.5     |
| Clnk      | 6.1   | 2.2   | 0.9     |
| Slpi      | 5.7   | 2.2   | 3.9     |
| Ccdc135   | 5.7   | 5.0   | 1.7     |
| Pgam2     | 5.6   | 1.5   | 2.7     |
| Hbegf     | 5.5   | 0.5   | 4.3     |

Down in *Ikzf1*<sup>ΔF4/ΔF4</sup> Thy only (cont.)

| Gene Name     | Thy | Notch | BCR-ABL |
|---------------|-----|-------|---------|
| Il18rap       | 5.5 | 1.9   | 4.0     |
| Tspan9        | 5.4 | 2.8   | 1.1     |
| Cd52          | 5.4 | 1.7   | 1.1     |
| Ccne1         | 5.3 | 1.7   | 0.9     |
| Lonrf1        | 5.3 | 2.1   | 0.7     |
| Ttc39c        | 5.3 | 1.0   | 0.6     |
| Gm12504       | 5.2 | 1.3   | 1.4     |
| Lcn4          | 5.1 | 3.7   | 6.3     |
| Socs2         | 5.0 | 1.1   | 0.8     |
| Id1           | 5.0 | 0.4   | 1.1     |
| Ahr           | 4.9 | 2.6   | 19.1    |
| Thbs1         | 4.9 | 1.3   | 1.8     |
| Cndp2         | 4.9 | 2.4   | 1.8     |
| Fgl2          | 4.8 | 7.8   | 2.4     |
| Fam129b       | 4.8 | 1.6   | 1.7     |
| Igsf8         | 4.8 | 1.6   | 0.8     |
| Slc25a12      | 4.7 | 2.6   | 1.2     |
| Mier2         | 4.7 | 1.4   | 1.1     |
| Rftn1         | 4.7 | 2.0   | 1.5     |
| Gas6          | 4.7 | 1.2   | 0.6     |
| Myl4          | 4.6 | 2.0   | 2.6     |
| Hp            | 4.6 | 1.3   | 1.8     |
| Mgst1         | 4.6 | 4.8   | 2.0     |
| D8Erd82e      | 4.5 | 1.3   | 1.2     |
| Galk1         | 4.5 | 1.5   | 0.8     |
| Angptl4       | 4.5 | 1.2   | 1.7     |
| Griffin       | 4.5 | 5.1   | 4.4     |
| 1110008P14Rik | 4.4 | 1.7   | 1.9     |
| Cyba          | 4.4 | 3.3   | 1.6     |
| Fam195a       | 4.4 | 1.8   | 1.2     |
| Rps6k1        | 4.3 | 1.3   | 2.9     |
| Esm1          | 4.3 | 0.5   | 0.8     |
| Il10ra        | 4.2 | 1.7   | 2.1     |
| Prkar2a       | 4.2 | 0.8   | 2.5     |
| Cish          | 4.2 | 1.8   | 1.4     |
| Fstl1         | 4.2 | 1.1   | 2.0     |
| Tpm4          | 4.2 | 2.2   | 1.2     |
| Tnnt1         | 4.2 | 2.1   | 3.3     |
| Gale          | 4.0 | 1.7   | 1.2     |
| Pparg         | 4.0 | 1.2   | 1.2     |
| Irf8          | 4.0 | 1.7   | 1.0     |
| Atp13a2       | 4.0 | 2.8   | 1.5     |
| Myo1f         | 4.0 | 2.3   | 2.5     |
| Ada           | 3.9 | 1.8   | 1.9     |
| Sema4a        | 3.9 | 1.4   | 2.4     |
| Haao          | 3.8 | 4.4   | 1.2     |
| Thy1          | 3.8 | 1.2   | 1.0     |
| Ogn           | 3.8 | 1.1   | 0.7     |
| Adam8         | 3.8 | 1.3   | 2.1     |
| Rplp1         | 3.8 | 1.3   | 1.3     |
| Ccr2          | 3.8 | 4.4   | 0.5     |
| Dcl2          | 3.8 | 3.1   | 0.6     |
| Arl4c         | 3.8 | 2.0   | 0.9     |
| Fam102a       | 3.8 | 2.5   | 0.9     |
| Padi2         | 3.7 | 2.6   | 1.9     |
| Larp1b        | 3.7 | 1.2   | 1.3     |
| Xylt1         | 3.7 | 0.9   | 1.5     |
| Uqcrcq        | 3.7 | 1.6   | 1.2     |
| Prss57        | 3.7 | 2.5   | 4.4     |
| 2210020M01Rik | 3.7 | 4.2   | 0.2     |
| Sh2d5         | 3.7 | 2.3   | 3.1     |
| Pdlim1        | 3.7 | 1.6   | 1.2     |
| Prr13         | 3.7 | 2.0   | 2.0     |
| Col1a1        | 3.7 | 1.1   | 2.1     |
| Rps6ka4       | 3.7 | 1.2   | 1.0     |
| Cd7           | 3.7 | 1.6   | 0.9     |
| Zfp518b       | 3.6 | 1.0   | 1.0     |
| Bcat1         | 3.6 | 2.2   | 1.0     |
| Dpm3          | 3.6 | 1.5   | 1.1     |

Down in *Ikzf1*<sup>ΔF4/ΔF4</sup> Thy only (cont.)

| Gene Name     | Thy | Notch | BCR-ABL |
|---------------|-----|-------|---------|
| Ldha          | 3.6 | 1.7   | 0.9     |
| Prtn3         | 3.6 | 2.2   | 0.6     |
| Baiap3        | 3.6 | 9.9   | 1.5     |
| Mospd3        | 3.6 | 1.3   | 1.1     |
| Ydjc          | 3.6 | 1.3   | 1.0     |
| Junb          | 3.5 | 1.2   | 1.8     |
| Tdrkh         | 3.5 | 2.8   | 2.5     |
| St3gal5       | 3.5 | 1.2   | 0.8     |
| Nme2          | 3.5 | 1.6   | 1.2     |
| Car12         | 3.4 | 1.1   | 1.5     |
| Pgp           | 3.4 | 1.4   | 1.0     |
| Relt          | 3.4 | 1.3   | 1.4     |
| Gbp8          | 3.4 | 3.3   | 3.4     |
| Ubt1          | 3.4 | 1.7   | 1.4     |
| 1190002H23Rik | 3.4 | 0.9   | 2.8     |
| Pgm2          | 3.4 | 2.2   | 1.3     |
| Palm          | 3.3 | 1.7   | 2.5     |
| Rnaseh2c      | 3.3 | 1.1   | 1.2     |
| Ms4a4b        | 3.3 | 2.2   | 13.1    |
| Fam169b       | 3.3 | 1.3   | 9.3     |
| Tpi1          | 3.2 | 2.3   | 1.0     |
| Il10rb        | 3.2 | 2.6   | 1.8     |
| Emb           | 3.2 | 0.8   | 0.2     |
| Ccbl2         | 3.2 | 1.4   | 1.7     |
| Dkk1          | 3.2 | 0.6   | 2.3     |
| Adam11        | 3.2 | 0.4   | 0.4     |
| Cenpv         | 3.2 | 1.5   | 1.1     |
| Tmem191c      | 3.2 | 2.2   | 1.8     |
| Gcsh          | 3.2 | 1.4   | 1.1     |
| Kifc3         | 3.2 | 6.3   | 1.6     |
| Tas1r1        | 3.2 | 1.6   | 2.9     |
| Ppa1          | 3.2 | 1.3   | 1.1     |
| Fam84b        | 3.2 | 1.0   | 1.6     |
| Ptgr1         | 3.1 | 0.9   | 2.9     |
| Egfl7         | 3.1 | 1.4   | 1.0     |
| Alas1         | 3.1 | 1.1   | 0.9     |
| Itga4         | 3.1 | 2.1   | 1.6     |
| Prss30        | 3.1 | 3.4   | 1.4     |
| Dgke          | 3.1 | 1.7   | 1.7     |
| Lactb         | 3.1 | 1.4   | 1.2     |
| Bgn           | 3.1 | 1.1   | 1.9     |
| Gpr25         | 3.1 | 1.2   | 1.0     |
| Ccdc124       | 3.1 | 1.2   | 1.3     |
| Bhlhe40       | 3.1 | 2.9   | 0.7     |
| Rag1          | 3.1 | 2.5   | 0.3     |
| Col1a2        | 3.1 | 1.2   | 2.4     |
| Fam174b       | 3.0 | 2.6   | 6.5     |
| Top1mt        | 3.0 | 1.2   | 0.7     |
| Ccnd3         | 3.0 | 2.2   | 1.4     |
| Edf1          | 3.0 | 1.4   | 1.1     |

Down in *Ikzf1*<sup>ΔF4/ΔF4</sup> Notch only

| Gene Name | Thy | Notch | BCR-ABL |
|-----------|-----|-------|---------|
| Tm4sf5    | 2.6 | 923.7 | 3.6     |
| Cox6a2    | 5.3 | 153.6 | 0.8     |
| Cd8a      | 2.5 | 64.5  | 1.0     |
| Zfp641    | 2.2 | 51.0  | 3.8     |
| Grhl3     | 2.9 | 47.9  | 0.9     |
| Tle6      | 1.8 | 38.5  | 0.3     |
| Hmgcs2    | 2.8 | 36.3  | 1.0     |
| Idi2      | 4.2 | 36.1  | 1.0     |
| Cdk1      | 2.4 | 32.9  | 2.1     |
| BC018473  | 4.4 | 31.5  | 2.8     |
| Rgl3      | 8.8 | 30.7  | 1.7     |
| Crhbp     | 6.4 | 27.6  | 2.2     |
| Ly6k      | 2.3 | 20.2  | 12.4    |
| Epor      | 4.6 | 20.1  | 4.2     |
| Cd4       | 1.2 | 20.0  | 7.3     |

Down in *Ikzf1*<sup>ΔF4/ΔF4</sup> Notch only (cont.)

| Gene Name     | Thy  | Notch | BCR-ABL |
|---------------|------|-------|---------|
| Ampd1         | 4.5  | 19.4  | 1.7     |
| Chrna9        | 1.6  | 18.7  | 0.7     |
| Nwd1          | 1.2  | 18.5  | 0.1     |
| Rgs11         | 2.5  | 18.4  | 1.4     |
| Il4ra         | 4.6  | 17.8  | 1.2     |
| Cd8b1         | 2.5  | 17.2  | 1.0     |
| 2310007L24Rik | 1.2  | 15.7  | 1.0     |
| Camk1g        | 1.0  | 15.6  | 0.8     |
| Tox2          | 7.8  | 15.1  | 2.8     |
| Cth           | 2.8  | 15.1  | 0.3     |
| Pygl          | 4.0  | 14.9  | 1.5     |
| Plcg2         | 2.8  | 14.8  | 1.1     |
| Stc2          | 0.3  | 14.2  | 1.6     |
| Dhrs3         | 2.4  | 14.1  | 2.2     |
| Muc13         | 1.2  | 13.8  | 5.2     |
| Rap1gap2      | 22.3 | 13.8  | 0.7     |
| Hoxa7         | 46.1 | 13.7  | 1.8     |
| Atp1b1        | 1.4  | 13.6  | 1.7     |
| Gbp11         | 5.6  | 13.6  | 17.2    |
| Pvr           | 4.4  | 13.1  | 1.3     |
| Btk           | 5.1  | 12.0  | 1.5     |
| H2-T3         | 1.6  | 11.9  | 0.5     |
| Elovl3        | 1.9  | 11.2  | 0.5     |
| Insl5         | 4.2  | 10.8  | 1.0     |
| Tmem221       | 1.8  | 10.5  | 4.3     |
| Timp3         | 2.7  | 10.0  | 2.7     |
| Gm12253       | 4.2  | 9.9   | 1.0     |
| 1700001O22Rik | 1.8  | 9.8   | 0.5     |
| Rorc          | 1.3  | 9.3   | 1.8     |
| Cd44          | 3.9  | 9.2   | 1.8     |
| Tmem45a       | 1.7  | 9.1   | 2.5     |
| Tubb2b        | 12.1 | 8.7   | 4.2     |
| Zfyve28       | 5.3  | 8.6   | 2.2     |
| 39328         | 1.0  | 8.3   | 1.3     |
| Zdhhc14       | 2.8  | 7.8   | 2.9     |
| Gpr162        | 1.1  | 7.8   | 4.4     |
| Slc37a2       | 1.4  | 7.8   | 1.5     |
| Dpf1          | 4.4  | 7.8   | 1.6     |
| Gab2          | 1.0  | 7.8   | 1.1     |
| Srgap3        | 0.5  | 7.7   | 1.7     |
| Cxadr         | 2.1  | 7.6   | 1.9     |
| Sidt1         | 2.0  | 7.5   | 1.1     |
| Erbp3         | 5.6  | 7.4   | 4.0     |
| Patl2         | 1.3  | 7.1   | 2.4     |
| Tmem90a       | 2.8  | 7.0   | 2.6     |
| Gm8909        | 1.5  | 7.0   | 3.8     |
| Card9         | 1.7  | 6.7   | 0.5     |
| Col15a1       | 3.7  | 6.5   | 4.8     |
| Ppp3cc        | 2.5  | 6.3   | 2.3     |
| Cd72          | 12.2 | 6.2   | 2.4     |
| B4galnt2      | 2.1  | 6.2   | 3.2     |
| Fam129a       | 1.3  | 6.2   | 0.2     |
| Degs2         | 1.5  | 6.2   | 1.0     |
| Il21r         | 2.0  | 6.2   | 2.1     |
| Dsp           | 4.7  | 6.1   | 0.9     |
| Ccr9          | 2.5  | 6.0   | 0.9     |
| H2-T10        | 1.3  | 5.9   | 1.6     |
| Fam183b       | 1.2  | 5.8   | 7.7     |
| Gramd3        | 1.6  | 5.7   | 1.1     |
| Nucb2         | 4.2  | 5.6   | 0.9     |
| Parvb         | 7.1  | 5.5   | 2.8     |
| P2rx1         | 2.0  | 5.5   | 2.1     |
| Icam1         | 2.3  | 5.4   | 2.7     |
| Gm14085       | 1.1  | 5.4   | 5.7     |
| P4ha2         | 1.2  | 5.4   | 0.6     |
| Bambi-ps1     | 2.2  | 5.3   | 2.0     |
| Tubb2a        | 2.8  | 5.2   | 1.3     |
| Ankrd6        | 1.7  | 5.1   | 1.3     |
| Scara3        | 3.1  | 5.1   | 2.6     |

Down in *Ikzf1*<sup>ΔF4/ΔF4</sup> Notch only (cont.)

| Gene Name | Thy | Notch | BCR-ABL |
|-----------|-----|-------|---------|
| Wdr78     | 1.8 | 5.1   | 0.9     |
| Vegfa     | 2.3 | 5.1   | 0.9     |
| Tmprss4   | 4.9 | 5.0   | 11.3    |
| Pdlim4    | 1.0 | 5.0   | 1.5     |
| Tns1      | 2.8 | 4.9   | 2.3     |
| Slc15a1   | 9.9 | 4.9   | 3.4     |
| Slc30a4   | 2.6 | 4.6   | 1.4     |
| Gsn       | 2.2 | 4.3   | 1.7     |
| Il2rb     | 8.5 | 4.2   | 0.1     |
| Akap12    | 1.7 | 4.2   | 1.4     |
| Gzmb      | 2.2 | 4.1   | 0.5     |
| Bcl6      | 1.2 | 4.0   | 1.4     |
| Meis3     | 1.6 | 3.9   | 2.0     |
| Tnfrsf9   | 2.4 | 3.9   | 2.2     |
| Dennd5a   | 0.8 | 3.9   | 0.9     |
| Bcl2l11   | 1.4 | 3.8   | 1.3     |
| Capn3     | 1.2 | 3.8   | 6.5     |
| Spint2    | 2.3 | 3.6   | 8.6     |
| Pou6f1    | 1.6 | 3.6   | 1.1     |
| Colq      | 6.8 | 3.4   | 1.9     |
| Slc43a2   | 1.6 | 3.4   | 1.5     |
| Ptcr      | 2.1 | 3.3   | 1.0     |
| Cerk      | 1.4 | 3.3   | 1.4     |
| Spns3     | 2.8 | 3.3   | 2.9     |
| Cd6       | 9.2 | 3.3   | 0.6     |
| Ets2      | 0.9 | 3.2   | 0.9     |
| Thrb      | 1.0 | 3.2   | 0.8     |
| Xbp1      | 2.5 | 3.1   | 3.0     |
| Camkk1    | 1.3 | 3.0   | 0.8     |
| Eif1b     | 1.2 | 3.0   | 1.4     |

Down in *Ikzf1*<sup>ΔF4/ΔF4</sup> BCR-ABL only

| Gene Name     | Thy  | Notch | BCR-ABL |
|---------------|------|-------|---------|
| Fcrl6         | 1.2  | 1.5   | 198.3   |
| Camk2b        | 42.3 | 15.1  | 167.8   |
| Rps6ka6       | 3.2  | 2.1   | 142.4   |
| Pdzd2         | 19.1 | 0.4   | 130.0   |
| Pde9a         | 3.3  | 0.3   | 122.0   |
| Crflf1        | 6.0  | 1.5   | 120.1   |
| Ubash3a       | 1.9  | 1.7   | 117.2   |
| Tmem59l       | 6.7  | 1.9   | 82.9    |
| Fzd6          | 1.1  | 0.0   | 77.3    |
| Cdhr2         | 1.4  | 1.5   | 71.4    |
| Dlx1          | 4.3  | 2.5   | 71.0    |
| Tnfrsf8       | 3.4  | 1.9   | 58.1    |
| Gldc          | 1.4  | 3.7   | 58.0    |
| Il2ra         | 2.1  | 1.0   | 55.2    |
| Btla          | 17.7 | 0.7   | 47.9    |
| Vill          | 4.2  | 2.4   | 46.0    |
| Prkcq         | 1.1  | 1.5   | 42.4    |
| Magi1         | 1.7  | 2.3   | 34.3    |
| Il33          | 4.3  | 1.7   | 34.0    |
| Enpep         | 4.7  | 1.6   | 26.3    |
| Sytl2         | 1.3  | 4.7   | 20.6    |
| Mpzl2         | 0.3  | 0.4   | 19.3    |
| Gja1          | 1.1  | 0.3   | 17.0    |
| Gpr171        | 1.8  | 0.9   | 15.4    |
| P2ry10        | 1.0  | 1.1   | 14.0    |
| Arpp21        | 2.7  | 1.5   | 13.6    |
| 2310033E01Rik | 2.4  | 1.5   | 13.1    |
| Pla2g2f       | 1.1  | 1.5   | 13.1    |
| Nov           | 8.2  | 2.3   | 12.2    |
| Gpr65         | 2.5  | 2.2   | 12.0    |
| Dpp4          | 1.4  | 0.7   | 11.1    |
| Als2cl        | 1.2  | 0.3   | 11.1    |
| 2210404O07Rik | 1.8  | 2.1   | 10.7    |
| Eli3          | 1.7  | 0.9   | 10.3    |
| Gbp2          | 1.4  | 1.3   | 10.1    |

Down in *Ikzf1*<sup>ΔF4/ΔF4</sup> BCR-ABL only (cont.)

| Gene Name     | Thy  | Notch | BCR-ABL |
|---------------|------|-------|---------|
| Akr1c13       | 2.5  | 1.6   | 10.0    |
| Scn4b         | 1.0  | 0.3   | 9.3     |
| Sell          | 1.4  | 0.6   | 9.0     |
| Rinl          | 1.7  | 1.5   | 7.9     |
| Lax1          | 1.3  | 1.0   | 7.8     |
| Pcdh9         | 1.5  | 0.5   | 7.7     |
| Sertad4       | 3.4  | 1.4   | 7.7     |
| Igf1          | 3.4  | 1.3   | 7.5     |
| Dok3          | 11.3 | 1.6   | 6.9     |
| Pyhin1        | 4.9  | 2.1   | 6.6     |
| Ly6a          | 0.7  | 1.9   | 6.5     |
| Zfp507        | 0.9  | 0.9   | 6.4     |
| Hmgcll1       | 2.7  | 1.5   | 6.4     |
| Atxn7l1       | 1.9  | 1.5   | 6.4     |
| Gpr18         | 4.2  | 1.4   | 6.2     |
| BC049715      | 1.8  | 1.9   | 6.1     |
| Cd74          | 1.3  | 1.1   | 6.1     |
| Folr4         | 7.1  | 1.8   | 6.0     |
| Endou         | 1.2  | 2.2   | 6.0     |
| Pdcd4         | 1.2  | 1.0   | 6.0     |
| Dntt          | 1.0  | 1.6   | 5.8     |
| 3110052M02Rik | 1.2  | 1.2   | 5.6     |
| Cav2          | 1.7  | 1.6   | 5.6     |
| Gbp4          | 1.6  | 2.1   | 5.5     |
| Rgs8          | 2.2  | 0.9   | 5.4     |
| Cpm           | 4.6  | 0.9   | 5.4     |
| Clic6         | 1.9  | 1.5   | 5.4     |
| Cybb          | 1.9  | 1.7   | 5.3     |
| Sytl1         | 2.0  | 2.0   | 5.3     |
| Ms4a7         | 1.2  | 1.0   | 5.3     |
| Zbtb80s       | 1.7  | 1.8   | 5.2     |
| Serpine2      | 1.6  | 2.7   | 5.2     |
| Gpr132        | 1.3  | 1.0   | 5.2     |
| Eci1          | 1.0  | 1.3   | 5.2     |
| Traf5         | 2.4  | 0.7   | 5.2     |
| Lat           | 1.2  | 1.5   | 5.1     |
| Tmem86a       | 1.3  | 1.3   | 5.0     |
| Arntl         | 1.7  | 2.1   | 5.0     |
| Mycn          | 2.5  | 1.8   | 4.9     |
| Dock8         | 1.1  | 1.3   | 4.8     |
| Ntng2         | 2.1  | 0.5   | 4.7     |
| Cnrip1        | 11.3 | 4.8   | 4.7     |
| Otub2         | 0.6  | 0.9   | 4.7     |
| Mcart6        | 1.7  | 1.3   | 4.7     |
| Serpinb2      | 2.4  | 1.5   | 4.6     |
| Slc14a1       | 2.0  | 2.3   | 4.6     |
| Nlrp3         | 3.5  | 3.8   | 4.6     |
| Crisp1        | 1.2  | 1.5   | 4.6     |
| Cacnb1        | 3.4  | 1.6   | 4.6     |
| Dio2          | 2.1  | 0.4   | 4.5     |
| Mxd4          | 1.8  | 2.1   | 4.5     |
| Sned1         | 6.3  | 1.2   | 4.4     |
| Sifn2         | 0.9  | 0.9   | 4.4     |
| 4632428N05Rik | 1.9  | 1.4   | 4.3     |
| Glpr1         | 1.6  | 2.2   | 4.2     |
| Gbp7          | 1.1  | 1.2   | 4.2     |
| Atp5k         | 2.9  | 1.6   | 4.2     |
| Gbp5          | 1.2  | 1.6   | 4.2     |
| Rnf157        | 1.7  | 1.3   | 4.1     |
| Hspb8         | 1.7  | 0.2   | 4.1     |
| Fam129c       | 1.6  | 1.3   | 4.0     |
| Gbp3          | 1.2  | 1.5   | 4.0     |
| Gm12250       | 2.9  | 2.3   | 4.0     |
| Apoe          | 0.5  | 1.6   | 4.0     |
| Tifa          | 1.3  | 0.3   | 3.9     |
| Hnf1b         | 1.5  | 1.5   | 3.9     |
| Ypel2         | 0.9  | 0.9   | 3.9     |
| Sla2          | 1.9  | 1.8   | 3.8     |
| Cd38          | 0.9  | 0.4   | 3.8     |

Down in *Ikzf1*<sup>ΔF4/ΔF4</sup> BCR-ABL only (cont.)

| Gene Name     | Thy | Notch | BCR-ABL |
|---------------|-----|-------|---------|
| Cacnb2        | 1.3 | 1.7   | 3.8     |
| Rpph1         | 5.5 | 1.3   | 3.8     |
| Mpeg1         | 2.1 | 2.1   | 3.8     |
| Spnb2         | 1.1 | 1.1   | 3.7     |
| Myl10         | 2.8 | 2.8   | 3.7     |
| Pltp          | 1.8 | 1.9   | 3.7     |
| Timp1         | 2.8 | 1.5   | 3.6     |
| Unc13d        | 2.4 | 1.6   | 3.6     |
| Clgn          | 3.2 | 2.6   | 3.6     |
| 5830405N20Rik | 1.4 | 0.9   | 3.5     |
| Bcl2          | 1.9 | 1.8   | 3.5     |
| Tgfb3         | 1.6 | 0.3   | 3.4     |

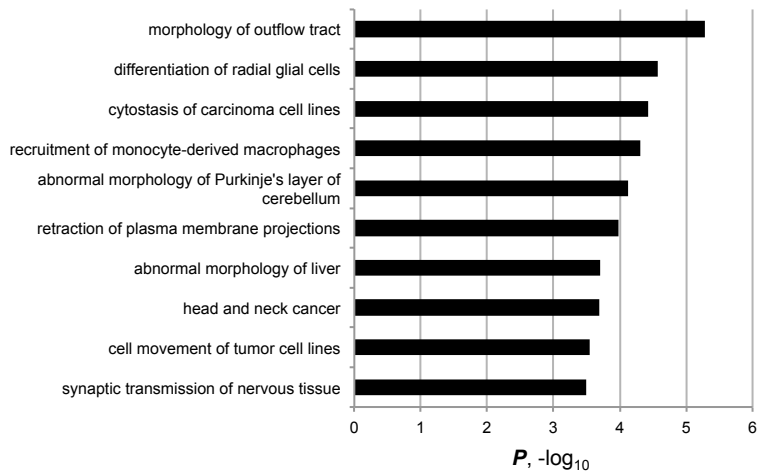

Supplement: supp_gad.266999.115_SuppFigs_Legends.pdf [file supp_gad.266999.115_SuppFigs_Legends.pdf]
